1 Classification: Biological sciences: *Neuroscience. Psychological and Cognitive Sciences.*

2 Title: Sensory-motor brain dynamics reflect architectural affordances

3

4 Authors: Zakaria Djebbara\*<sup>1</sup> ORCID: 0000-0003-2370-6092

5 Lars Brorson Fich<sup>1</sup> ORCID: 0000-0002-6760-0540

6 Laura Petrini<sup>2</sup> ORCID: 0000-0002-5320-1944

7 Klaus Gramann<sup>3, 4, 5</sup> ORCID: 0000-0003-2673-1832

8 Author affiliations:

9 <sup>1</sup> Department of Architecture, Design, Media and Technology, Aalborg  
10 University, Denmark

11 <sup>2</sup> Department of Communication and Psychology, Aalborg University,  
12 Denmark

13 <sup>3</sup> Biological Psychology and Neuroergonomics, Berlin Institute of Technology,  
14 Berlin, Germany

15 <sup>4</sup> School of Software, University of Technology Sydney, Sydney, Australia

16 <sup>5</sup> Center for Advanced Neurological Engineering, University of California, San  
17 Diego, CA, USA

18

19 \*Corresponding author: [zadj@create.aau.dk](mailto:zadj@create.aau.dk)

20

21 Keywords: sensorimotor, predictive processing, architectural cognition, motor-related  
22 cortical potentials, mobile EEG, Mobile Brain/Body Imaging

23

24

25 **ABSTRACT (150 words)**

26

27 Anticipating meaningful actions in the environment is an essential function of the brain. Such predictive  
28 mechanisms originate from the motor system and allow for inferring actions from environmental  
29 affordances, the potential to act within a specific environment. Using architecture, we provide a unique  
30 perspective to the abiding debate in cognitive neuroscience and philosophy on whether cognition depends on  
31 movement or is decoupled from our physical structure. To investigate cognitive processes associated with  
32 architectural affordances, we used a Mobile Brain/Body Imaging approach recording brain activity  
33 synchronized to head-mounted virtual reality. Participants perceived and acted upon virtual transitions  
34 ranging from non-passable to easily passable. We demonstrate that early sensory brain activity, upon  
35 revealing the environment and before actual movement, differed as a function of affordances. Additionally,  
36 movement through transitions was preceded by a motor-related negative component also depended on  
37 affordances. Our results suggest that potential actions afforded by an environment influence perception.

38

39

40

41 **SIGNIFICANCE STATEMENT (118 words)**

42

43 By using electroencephalography and virtual reality, our research provide a unique perspective to the  
44 centurial open-ended debate in cognitive neuroscience and philosophy on the relation between cognition,  
45 movement and environment. Our results indicate that cortical potentials vary as a function of bodily  
46 affordances reflected by the physical environment. Firstly, the results of this study implies that cognition is  
47 inherently related to potential movement of the body, thus we advance that action is interrelated with  
48 perception, actively influencing the perceivable environment. Secondly, as cortical potentials are influenced  
49 by the potential to move, which in turn is the task of architectural design, architects holds largely a privilege  
50 of human health, and thus potentially capable of provoking and preventing physiological conditions.

51

52

53

54 **INTRODUCTION.** The affordance of a given spatial environment, defined as the perception of possibilities  
55 for, or restraints on, action that the environment offers, is essential for an agent to produce meaningful  
56 behavior. Thus, the affordances of the spatial environment becomes a central concept for humans interacting  
57 with their world. The term *affordances* was first introduced by Gibson (1), and later specified by various  
58 authors including Clark who defines affordance as “[...] *the possibilities for use, intervention and action which*  
59 *the physical world offers a given agent and are determined by the ‘fit’ between the agent’s physical structure,*  
60 *capacities and skills and the action-related properties of the environment itself.*” (2). In light of emerging  
61 theories of embodied cognition, the perception of the environment may be dependent on proprioceptive  
62 mechanisms. According to predictive processing, a neuroscientifically based theory of embodied cognition (3–  
63 5), motor systems, similar to perceptual processes, aim at cancelling out continuously incoming bottom-up  
64 sensory signals with top-down predictions. In this perspective, movement emerges as a result of an *active*  
65 *inference* that attempts to either minimizing motor trajectory prediction errors by acting, and thus perceiving  
66 the unfolding of the predicted movement, or by changing perception itself (6–8). From the standpoint of active  
67 inference, motor systems suppress errors through a dynamic interchange of prediction and action. In other  
68 words, there are two ways to minimizing prediction errors; one is to adjust predictions to fit the current sensory  
69 input, while another is to adapt the unfolding of movement to make predictions come true. It is a unifying  
70 perspective on perception and action suggesting that action is both perceived and caused by perception (9).  
71 Hence, action, perception, and cognition coordinate to move the body in ways that conform a transitional set  
72 of expectations (10). The claim we seek to investigate in the present study is that perception is rooted in action,  
73 creating an action-perception loop, informed by dynamically (top-down/bottom-up) generated prediction  
74 errors. Ultimately, the argument is that perception is not the sole result of sensing the physical world, but  
75 unfolds as an ongoing interaction between sensory processes and bodily actions. Such a claim has  
76 philosophical and neuroscientific significance as the neural dynamics underlying perception would be  
77 intimately dependent on the affordances of a given environment.

78  
79 To further investigate this claim, we used electroencephalographic (EEG) recordings to address the neural  
80 dynamics of action-perception interactions through affordance manipulations in architectural experiences.  
81 More specifically, we investigated the affordances of transitions as they form an ideal candidate due to their  
82 dynamic nature concerning the duration of altering one condition to another (11). We here confine transitions  
83 to *the passage between spaces* which, according to the enactivists’ proposed action-perception loop, will be  
84 experience dependent on the affordances offered by the passage itself. From an architecturally historical point  
85 of view, the use of transitions have evidently been exploited at least since eleventh-thirteenth dynasties (e.g.,  
86 Fazio et al., 2008, chaps. 1, 2, 5). Written interest in human experience of architectural settings has been  
87 established at least for the last two millennia (e.g., Norberg-Schulz, 1965; Palladio, 1997; Pallasmaa, 2011;  
88 Rasmussen, 1959; Vitruvius and Morgan, 1960). Despite transitions being ubiquitous in architecture, the  
89 underlying mechanisms of how transitions affect human perceivers appears to have taken an implicit,  
90 overlooked, and close to nonexistent position in architectural discourse, with few exceptions (15, 18–20). Due  
91 to the dynamic nature of architecture, an essential part of transitions and experiencing architecture is that of  
92 being able to act (21). Traditionally, investigations of architectural experiences are phenomenological – the  
93 description of phenomena in how experience gives access to a world of space and time (14, 22–24). Such  
94 descriptions find specifically movement of the individual to be an expression of a holistic experience of  
95 architecture (14, 22), linking the nature of movement to architectural experiences (25). Transitions in  
96 architecture depend on voluntary movement and thus a prerequisite for any transit is a goal, which in turn calls  
97 for action planning. Coarsely three parameters compose a transition: a motivated goal, a change in physical  
98 environment and the unfolding of action. All three parameters are interdependent, as reaching a goal depends  
99 on the affordance offered by an environment, and also propels the body in space contributing to experience.

100 Architectural transitions thus include the attenuation of an agent's experience through movements and how  
101 such movements animate the body through environmental changes.

102  
103 Data from neuroscientific experiments addressing this issue might contribute to discussions centered on  
104 philosophical questions on how we relate to the world. For long, enactivists have implicated the reciprocal  
105 dependency of the living organism, as a self-organized living system, and the embedded body in a world for  
106 cognition (26–28). Enactivism is rooted in phenomenology (21, 29), similar to prominent architectural  
107 theorists, who put body, action, and cognition central to experience. Active inference closely relates to  
108 enactivism, in the sense that we act to perceive, and vice versa. Such a thesis rests on a hierarchical and  
109 dynamic model of the world, which temporally dissociates lower sensorimotor inferences from higher  
110 motivated goals, as fast and slow, respectively (30). Fast, lower sensorimotor inferences depict processes of  
111 affordances, which thereby must be present in early stages of perception. Hierarchical affordance competition  
112 (HAC; Pezzulo and Cisek, 2016) takes the temporal aspect of affordances much further, by suggesting that  
113 cortical activity relates to the immediate decision of action selection, which occurs fluently during movement.  
114 Such an account of temporally extended affordance is in accordance with active inferences.

115  
116 To investigate the impact of environmental affordances on early sensory processing in actively transiting  
117 humans, we used a Mobile Brain/Body Imaging approach (32–34) recording brain activity with EEG  
118 synchronized to movement recordings and head mounted virtual reality (VR). This approach allows for  
119 investigating brain dynamics of participants perceiving an environment and the transitions contained therein  
120 as well as brain dynamics during the transitions itself. Previous studies investigating event-related potential  
121 (ERP) activity in stationary participants demonstrated slow cortical potentials to indicate anticipative motor  
122 behavior (for an overview, see Luck and Kappenman, 2011, chap. 8). Known motor-related cortical  
123 components (MRCPs) are the readiness potential (RP; Kornhuber and Deecke, 2016), contingent negative  
124 variation (CNV), and the stimulus-preceding negativity (SPN; Brunia, 2003), which can be seen as indicators  
125 of predictive behavior (38). MRCPs are negative going waveforms preceding an actual, or imagined, motor  
126 execution. However, these negative components are associated with multiple processes including sensory,  
127 cognitive, and motor systems. In a study by Bozzacchi et al. (39), the authors attempted to measure affordances  
128 of a physical object by evaluating whether the anticipated consequence of action itself influence the brain  
129 activity preceding a self-paced action. The authors compared MRCPs of situations where it was possible to  
130 reach out and grasp a cup, versus situations where it was impossible to grasp the cup, by tying the hands of the  
131 participants. A motor execution was forced at all times. In situations where it was impossible to grasp the cup,  
132 the authors reported an absence of early activity over the parietal cortex, and found instead increased activity  
133 over the prefrontal cortex. The results were interpreted as reflecting an awareness of the inability to execute a  
134 goal-oriented action. Closely related to the MRCPs is the post-imperative negative variation (PINV), a negative  
135 going waveform that is present succeeding an imperative stimulus. It reflects the immediate motor execution  
136 related to the onset of an imperative stimulus and was observed during experiments investigating learned  
137 helplessness or loss of control (40, 41). The PINV thus allows linking of motor related potentials to anticipation  
138 of affective states (42).

139  
140 If an enactive account of perception, action and cognition is correct, affordances intimately relate to higher  
141 hierarchical levels through low-level perceptual cues. Such an account would situate processing of affordances  
142 at a similar stage as early perceptual processes and should reveal differences in sensory and motor-related  
143 ERPs associated with the perceived affordance of an environment. To investigate whether brain activity is  
144 altered depending on affordances offered by the environment, we presented human observers with  
145 environmental stimuli that allowed or prohibited a transition from one room to the next. To this end,

146 participants were presented with a view into a room containing one door of different widths, allowing or  
147 prohibiting a transition into the next room and thus providing different affordances. We expected to find  
148 differences in cortical responses to co-vary as a function of affordances over sensory and motor areas. In  
149 addition, we expected differences in motor-related cortical potentials as a function of the environmental  
150 affordances when participants were instructed to walk through the door or to remain in the same room.

151

## 152 **METHODS**

153 **Participants.** 20 participants (9 female) without history of neurological pathologies were recruited from a  
154 participant pool of the Technical University of Berlin, Berlin. All participants read and signed a written  
155 informed consent about the experimental protocol, which was approved by the local ethics committee.  
156 Participants received either monetary compensation (10€/hour) or accredited course hours. The mean age  
157 was 28.1 years ( $\sigma = 6.2$ ), all participants had normal or corrected to normal vision and none had a specific  
158 background in architecture (no architects or architectural students). One participant was excluded due to  
159 technical issues of the experimental setup.

160

161 **Paradigm description.** The experiment took place in the Berlin Mobile Brain/Body Imaging Laboratories  
162 (BeMoBIL) with one of the experimental rooms providing a space of 160 m<sup>2</sup>. The size of the virtual space  
163 was 9 x 5 meters with a room size of 4.5 x 5 meters for the first room and a room size of 4.5 x 5 meters for  
164 the second room. Participants performed a forewarned (S1-S2) *Go/NoGo* paradigm (pseudo-randomized  
165 50/50) in the virtual reality environment that required them to walk from one room to a second room. Doors  
166 of different width ranging from unpassable (20 cm, *Narrow*) to passable (100 cm, *Mid*) to easily passable  
167 (1500 cm, *Wide*) manipulated the transition affordance between rooms. The experiment consisted of a 3 x 2  
168 repeated measures design including the factors door width (*Narrow, Mid, Wide*; pseudo-randomized) and  
169 movement instruction (*Go, NoGo*). A total of 240 trials per participant was collected with 40 trials for each  
170 of the factor levels. One trial consisted of a participant starting in a dark environment on a predefined starting  
171 square (see Figure 1). The “lights” would go on after a random inter-trial-interval (mean = 3 s,  $\sigma = 1$  s), and  
172 participants faced a room with a closed door. They were instructed to wait (mean = 6 s,  $\sigma = 1$  s) for a color  
173 change of the door with a change to green indicating a *Go* trial and a change to red indicating a *NoGo* trial.  
174 In case of a green door, the participant walked towards the door, which would slide aside. Upon entering the  
175 subsequent space, participants were instructed to find and virtually touch a red rotating circle by using the  
176 controller. The circle would inform the participant to have earned another 0.1€ to their basic reimbursement  
177 of 10 Euro per hour. After each trial, participants had to give an emotional rating for the environment  
178 irrespective of whether they transitioned through the door (*Go* condition) or whether they remained in the  
179 same room (*NoGo* condition) without transition. To this end, participants were instructed to go back to the  
180 starting square, and fill in a virtual Self-Assessment Manikin (SAM) questionnaire, using a laser pointer  
181 from the controller, and to subsequently pulling the response button located at the pointer finger to turn the  
182 “lights off”. The lights would go back on automatically to start the next trial.

183

184 In *Go*-trials, participants were instructed to walk towards the door and into the second room even in case the  
185 door was too narrow to pass. This was done to control for motor execution in the *Go*-condition and to allow  
186 movement towards the goal irrespective of the affordance (passable vs. unpassable). Upon touching the  
187 surrounding walls, the walls would turn red and inform the participants they have failed to pass, and thus must  
188 return to the start square, fill in the virtual SAM and start the next trial by pulling the trigger. Participants  
189 would quickly notice that the narrow door (20 cm) was impossible to pass without producing the warning  
190 feedback that they have failed to pass. All participants had a training phase to get accustomed to the VR  
191 environment and the different conditions. The experimenter observed the participants from a control room,

192 separated from the experimental space, using two cameras and a mirrored display of the virtual environment  
193 to reduce interactions to a minimum during the experiments.

194

195 [Figure 1 about here](#)

196

197 **Subjective and Behavioral data.** To investigate the subjective experience of the transitions, we introduced  
198 the participants with a virtual Self-Assessment Manikin (SAM) questionnaire after each trial. The SAM is a  
199 pictorial assessment of pleasure, arousal and dominance on a 5-point Likert scale (43). The manikin display  
200 ranges from smiling to frowning (*pleasure*), from a dot in the stomach to an explosion (*arousal*) and from  
201 being very small to very big (*dominance*). Participants were asked to self-assess their current state after each  
202 trial. Furthermore, we measured the reaction time from the onset of the *Go*-stimulus (door color change) to  
203 reaching the opening-threshold itself, to assess the behavior. The data was analyzed using ANOVA with the  
204 width of the doors as repeated measures factor. In case of violation of normality and homogeneity, corrected  
205 p-values are reported. For post-hoc analysis, the data was contrasted using Tukey HSD.

206

207 **EEG Recording and data analysis.** To investigate the impact of transitional affordances on human  
208 cognition and brain dynamics, we used a MoBI approach (32–34, 44) recording human brain dynamics in  
209 participants actively transitioning through virtual rooms. All data streams were recorded and synchronized  
210 using LabStreamingLayer (LSL; Kothe, 2014). Participants wore a backpack, which held a high-performance  
211 gaming computer to render the VR environment (Zotac, PC Partner Limited, Hong Kong, China) attached to  
212 two batteries and an EEG amplifier system. We combined a Windows Mixed Reality (WMR; 2.89", 2880 x  
213 1440 resolution, update rate at 90 Hz, 100 degree field of view with a weight of 440 grams, linked to the  
214 Zotac computer through HDMI) headset and one controller by ACER to display and interact with the virtual  
215 environment based on Unity (see Figure 2). Events for recordings of performance and physiological data  
216 were triggered by the position of the participant in the tracking space or by the respective response buttons of  
217 the remote control. Specific events, such as touching the wall, all button presses, transitioning through the  
218 door, answering the questionnaire and all cases of “lights on” (and off), were synchronized with the recorded  
219 brain activity and the presented VR environment through LSL.

220

221 [Figure 2 about here](#)

222

223 EEG data was acquired continuously with a 64 channels EEG system (eegoSports, ANT Neuro, Enschede,  
224 Netherlands), sampled with 500 Hz. Impedances were kept below 10 kOhm. The computational delay  
225 generated by the interaction of ANT Neuro software, Windows Mixed Reality and Unity was measured to be  
226 20 ms ( $\sigma = 4$ ), which was taken into account during the analysis by subtracting the average delay from each  
227 event latency. With a jitter of 4 ms, we considered the delay to have little to no impact on the ERPs. Offline  
228 analysis were conducted using MATLAB (MathWorks, Natick, MA, USA) and the EEGLAB toolbox (46).  
229 The raw data were band-pass filtered between 1 Hz and 100 Hz and down-sampled to 250 Hz. Channels with  
230 more than five standard deviations from the joint probability of the recorded electrodes were removed and  
231 subsequently interpolated. The datasets were then re-referenced to an average reference and adaptive mixture  
232 independent component analysis (AMICA; Palmer et al., 2011) was computed on the remaining rank of the  
233 data using one model with online artifact rejection in five iterations. The resultant ICA spheres and weights  
234 matrices were transferred to the raw dataset that was preprocessed using the identical preprocessing parameters  
235 like the ICA dataset, except the filtering, which used a band-pass filter from 0.2 Hz to 40 Hz. Subsequently,  
236 independent components (ICs) reflecting eye movements (blinks and horizontal movements) were removed  
237 manually based on their topography, their spectrum, and their temporal characteristics.

238

239 Epochs were created time-locked to the onset of the room including the closed door (“Lights on”) from -500  
240 ms before to 1500 ms after stimulus onset for *Narrow, Mid* and *Wide* door trials. Similarly, another set of  
241 epochs were time-locked to the second stimulus *Go/NoGo* from -500 ms before to 1000 ms after onset of the  
242 stimulus for *Narrow, Mid* and *Wide* door trials. On average, 15% ( $\sigma = 10.8$ ) of all epochs were automatically  
243 rejected when they deviated more than five standard deviations from the joint probability and distribution of  
244 the activity of all recorded electrodes.

245

246 The visual-evoked potentials as well as MRCPs were analyzed at central midline electrodes (*Fz, FCz, Cz, Pz,*  
247 *POz* and *Oz*) covering all relevant locations including the visual and the motor cortex as reported in previous  
248 studies (39, 48). As stimuli were distributed across the complete visual field and participants walked through  
249 the virtual spaces, we did not expect any lateralization of ERPs. All channels were analyzed, however only  
250 three channels (*FCz, Pz* and *Oz*) are reported and discussed in-text according to reported results by Bozzacchi  
251 et al. (39). The analysis results of all six channels can be found in the supplementary material. For peak analysis  
252 of the P1-N1 complex, the grand average peaks were estimated and individual peaks were defined as the  
253 maximum positive and negative peak in the time window surrounding the grand average P1 and N1 peak ( $\pm$   
254 10 ms from peak), respectively. An automatic peak detection algorithm detected the peaks in the averaged  
255 epochs for each participant. Multiple peaks were detected and systematically weighed depending on the  
256 magnitude, the distance to the grand-average peak latency that was determined by visual inspection of grand  
257 average ERP, and the polarity (please see algorithm in the supplementary material). For anterior N1 and  
258 posterior P1, by visual inspection of the grand average ERPs, the grand-average latency was estimated to be  
259 140 ms with a search window for individual peaks ranging from 50 – 200 ms. For the anterior P1 and posterior  
260 N1 the grand-average peak latency was estimated to 215 ms with a search window for individual peaks ranging  
261 from 140 – 290 ms.

262

263 Mean peak amplitudes were analyzed using a 3 x 3 repeated measures ANOVA using the door width (*Narrow,*  
264 *Mid, Wide*) and electrode as repeated measures. The results descriptions focus on the visual evoked P1  
265 component at posterior electrodes (*Pz, POz* and *Oz*) and the N1 component at frontal leads (*Fz, FCz* and *Cz*)  
266 based on separate ANOVAs. For the N2 and P2 component at posterior electrodes (*Pz, POz* and *Oz*) and frontal  
267 leads (*Fz, FCz* and *Cz*), separate ANOVAs were computed in the time-range of 140 – 290 ms. For the later  
268 motor related potentials, an ANOVA was computed for the mean amplitude in the time-range from 600 to 800  
269 ms. The data was analyzed using a 2 x 3 x 6 factorial repeated measures ANOVA with the factors imperative  
270 stimulus (*Go* and *NoGo*), door width (*Narrow, Mid* and *Wide*), time window (600-700 ms, 700-800 ms) and  
271 electrode location (*Fz, FCz, Cz, Pz, POz* and *Oz*). For post-hoc analysis, the data was contrasted using Tukey  
272 HSD. In case of violations of the sphericity, corrected p-values are reported. All ANOVA were computed as  
273 linear mixed models and all p-values for Tukey HSD contrasts were adjusted using Bonferroni method to  
274 account for “within” study design.

275

## 276 RESULTS

277

### 278 Subjective and Behavioral results

279

280 **SAM Ratings.** A 2 x 3 factorial repeated measures ANOVA with the factors imperative stimulus (*Go* and  
281 *NoGo*) and door width (*Narrow, Mid* and *Wide*) for each emotional dimension of the SAM questionnaire  
282 revealed differences in the main effect for width: *Arousal* ( $F_{2,4326} = 95.12, p < 0.0001$ ), *Dominance* ( $F_{2,4326} =$   
283  $46.42, p < 0.0001$ ) and *Valence* ( $F_{2,4326} = 188.65, p < 0.0001$ ). For the imperative stimulus, differences were

284 found for *Arousal* ( $F_{2, 4326} = 443.54, p < 0.0001$ ), *Dominance* ( $F_{2, 4326} = 435.49, p < 0.0001$ ), and *Valence* ( $F_{2, 4326} = 446.20, p < 0.0001$ ). Interaction effects revealed significant difference for all interactions (*all*  $p < 0.0001$ ). Post-hoc contrasts using Tukey HSD (Figure 3) showed no significant differences for *NoGo* in *Arousal*, however significant differences were identified for *Go* between *Narrow-Mid* ( $p < 0.0001$ ), *Narrow-Wide* ( $p < 0.0001$ ) and *Mid-Wide* ( $p < 0.0001$ ). For *NoGo* in *Dominance* no significant differences were revealed between *Narrow-Mid* ( $p = 0.1376$ ), as opposed to *Narrow-Wide* ( $p < 0.0001$ ) and *Mid-Wide* ( $p = 0.0334$ ), whereas for *Go* no significant differences were found for *Mid-Wide* ( $p = 0.2199$ ), as opposed to *Narrow-Mid* ( $p < 0.0001$ ) and *Narrow-Wide* ( $p < 0.0001$ ). For *Valence*, significant difference were revealed for all contrasts for *Go*, *Narrow-Mid* ( $p < 0.0001$ ), *Narrow-Wide* ( $p < 0.0001$ ) and *Mid-Wide* ( $p < 0.0001$ ). However, for *NoGo* significant differences were only identified for *Narrow-Mid* ( $p < 0.0001$ ) and *Narrow-Wide* ( $p < 0.0001$ ).

295  
296 [Figure 3 about here](#)

297  
298 **Performance.** To investigate the time it took participants from the *Go*-stimulus to passing the door, a one-way ANOVA with repeated measures for different door widths was computed revealing a significant difference for the factor door widths ( $F_{2,36} = 6.404, p = 0.0042$ ; Figure 4). Post-hoc comparison (Tukey test) showed no significant differences in behavior when approaching the *Narrow* or *Mid* wide doors ( $p > 0.1$ ), a tendency to be slower when approaching *Mid* as compared to *Wide* doors ( $p < 0.1$ ), and a significant difference between approaching *Narrow* as compared to *Wide* door ( $p < 0.001$ ) with significantly faster approach times for the *Wide* door condition.

305  
306 [Figure 4 about here](#)

### 307 308 **EEG - Early event-related potentials**

309  
310 **Posterior P1.** With onset of the lights that allowed participants to see the room including the door (“Lights on”), the ERPs demonstrated a clear P1-N1 complex most pronounced over the occipital midline electrode with a first positive component around 100 ms, followed by a negative peak around 200 ms (Figure 5.1 and see Figure 5.2 in supplementary materials for full six channels). At the frontal midline electrode, this pattern was inversed and a negative component around 100 ms was followed by a positive peak observed around 200 ms. The 3 x 3 repeated measures ANOVA on P1 amplitudes for posterior electrodes revealed significant main effects for both the factors widths ( $F_{2,108} = 8.163, p = 0.005$ ) and channel ( $F_{2,36} = 15.868, p < 0.0001$ ). The interaction effect was not significant ( $F_{4,108} = 1.669, p = 0.1624$ ). Post-hoc comparisons using Tukey HSD test revealed significant differences in peak amplitudes at channel  $O_z$  between *Narrow* and *Mid* wide transitions ( $p = 0.0021$ ) and between *Narrow* and *Wide* transitions ( $p = 0.0065$ ) but no differences between *Mid* and *Wide* transitions ( $p = 1$ ). Tukey contrasts yielded no significant differences between electrodes, with differences in P1 amplitudes at  $PO_z$  comparing *Narrow* and *Wide* transitions ( $p = 0.028$ ).

322  
323 [Figure 5.1 about here](#)

324  
325 **Posterior N1.** The 3 x 3 repeated measure ANOVA on N1 amplitudes for posterior electrodes revealed a significant main effect for the factor door widths ( $F_{2,108} = 4.348, p = 0.0153$ ) and no significant impact for the factor channels ( $F_{2,36} = 0.0893, p = 0.9147$ ), nor the interaction ( $F_{4,108} = 1.304, p = 0.2731$ ). Post-hoc Tukey HSD contrasts revealed no significant differences for  $P_z$  and  $PO_z$ . However, similar to posterior P1, significant



329 differences at  $O_z$  for the comparison of Narrow and Mid wide transitions ( $p = 0.0113$ ) and for the comparison  
330 of *Narrow* and *Wide* transitions ( $p = 0.0372$ ) were found (Figure 6).

331  
332 [Figure 6 about here](#)

333  
334 **Anterior P1.** An inverse pattern was observed for amplitudes over anterior leads with a main effect of door  
335 widths that differed depending on the affordances ( $F_{2,108} = 11.071, p < 0.0001$ ). The main effect of channels  
336 also reached significance ( $F_{2,36} = 5.3627, p = 0.0092$ ). Tukey HSD contrasts revealed significant differences  
337 only between *Narrow* and *Wide* transitions for  $FC_z$  ( $p = 0.0071$ ) and  $C_z$  ( $p = 0.0214$ ), and a tendency at  $F_z$  ( $p$   
338  $= 0.0717$ ). The interaction was not significant.

339  
340 **Anterior N1.** The 3 x 3 repeated measures ANOVA on N1 amplitudes for anterior electrodes revealed no  
341 significant main effect for the factor door widths ( $F_{2,108} = 1.823, p = 0.1663$ ). In contrast, the main effect of  
342 channels reached significance ( $F_{2,108} = 8.109, p = 0.0012$ ). The interaction did not reach significance.

343  
344 **EEG - Motor-related processes.** After onset of the imperative stimulus a positive peak at anterior leads and  
345 a negative peak at posterior leads were observed. For sake of brevity, this potential complex is referred to as  
346 early post imperative complex (EPIC). Reflecting similar cortical polarity as the P1-N1 complex, the EPIC  
347 was analyzed in a similar way, separating anterior leads ( $F_z, FC_z$  and  $C_z$ ) from posterior leads ( $P_z, PO_z$  and  
348  $O_z$ ), and detecting single peaks in individual averages.

349  
350 **Anterior EPIC.** A 2 x 3 x 3 repeated measures ANOVA revealed significant difference in the main effect for  
351 widths ( $F_{2,270} = 4.21, p = 0.0157$ ), imperative stimulus ( $F_{1,270} = 23.66, p < 0.0001$ ), and for channel ( $F_{2,36} =$   
352  $6.70, p = 0.0033$ ). No interaction effect was observed. The Bonferroni-corrected post-hoc Tukey HSD revealed  
353 no significant differences between the transition widths for different channels or imperative stimuli.

354  
355 **Posterior EPIC.** The identical ANOVA for the posterior potentials of the EPIC revealed no significant impact  
356 of transition widths ( $F_{2,270} = 2.001, p = 0.1371$ ) nor imperative stimulus ( $F_{1,270} = 2.30, p = 0.1298$ ). Significant  
357 differences in EPIC amplitude were observed for the factor channel ( $F_{2,36} = 5.45, p = 0.0085$ ). Since  
358 topographical differences were not in the focus of this study, no further post-hoc contrasts were computed. No  
359 interaction was significant.

360  
361 **PINV.** In the preparation time prior to the onset of the door color change, indicating either to walk through the  
362 door or to remain in the same room, we observed no systematic negative going waveform as reported in  
363 previous studies (37, 49). However, after onset of the color change, a pronounced positivity, followed by a  
364 long-lasting negative waveform over fronto-central locations was observed in the ERP (Figure 7.1 and see  
365 Figure 7.2 in supplementary material for full six channels). This negative waveform resembled a post-  
366 imperative negative variation (PINV) as described in previous studies (40, 42, 50). The PINV component was  
367 observed 600-800 ms post imperative stimulus (color change of the door) and varied as a function of the  
368 affordance of the environment (door width). A global 2 x 3 x 6 factorial repeated measures ANOVA was  
369 computed to analyze the MRCPs using *Go/NoGo*, *Width* and *Electrode* as repeated measures. The ANOVA  
370 revealed significant differences in the main effect for *Go/NoGo* ( $F_{1,540} = 19.54, p < 0.0001$ ) and for *Electrode*  
371 ( $F_{5,90} = 16.69, p < 0.0001$ ). Significant differences were reported for the interaction effect of  
372 *Go/NoGo:Channel* ( $F_{5,540} = 5.25, p = 0.0001$ ) and for *Width:Channel* ( $F_{10,540} = 2.61, p = 0.0042$ ).

373  
374 [Figure 7.1 about here](#)

375  
376 Post-hoc contrasts, using Tukey HSD, revealed significant differences only for the *Go* condition, as opposed  
377 to the *NoGo* condition (Figure 8.1). Similar to the early evoked potentials, differences were only observed in  
378 frontal and occipital sites and between *Narrow* and *Mid* door widths over *FCz* ( $p = 0.0059$ ) and *Oz* ( $p <$   
379  $0.0001$ ), as well as between *Narrow* and *Wide* doors at *FCz* ( $p = 0.0323$ ) and *Oz* ( $p < 0.0001$ ). No differences  
380 were observed between the *Mid* and *Wide* doors (Figure 8.2 in the supplementary material for all six channels).

381  
382 [Figure 8.1 about here](#)

## 383 384 **DISCUSSION**

385 The main goal of this study was to assess whether brain activity is altered depending on the affordances offered  
386 by the environment. If such an account holds true, affordances should systematically modulate behavior and  
387 brain activity. Specifically, we hypothesized that perceptual processes co-vary with the environmental  
388 affordances leading to behavioral changes and that motor-related cortical potentials would vary as a function  
389 of affordances.

390  
391 **SAM and approach time.** The results of the questionnaire should be interpreted with caution due to the  
392 amount of trials per participant, the varying sensitivity to VR and the different skills of subjective emotional  
393 evaluation. The analysis of subjective ratings revealed significant differences between different *Go* trials, but  
394 no differences for *NoGo* trials regarding *Arousal* ratings. When given a *NoGo*, participants responded  
395 perhaps arbitrarily, feeling unburdened, causing no significant difference among the three door widths.  
396 Notably, in cases of *NoGo*, all participants perceived a similar scene standing in front of a red (*NoGo*) door,  
397 turning around and answering the virtual SAM. The only variable in this sense was the door width, while the  
398 only difference from *NoGo* to *Go*, was the action itself. The subjective ratings highlight the influence of  
399 action on evaluating the environment. If space was to be investigated statically (comparable to the case of  
400 *NoGo*), we would not have been able to detect any differences for *Arousal* for varying door sizes, potentially  
401 due to the absence of action. Varying door sizes for *Go* trials yielded differences between passable and  
402 impassable conditions for *Dominance*, reporting that *Narrow* door was more dominating than *Mid* and *Wide*.  
403 However, for *Valence* we observed an increasing score the narrower the door, which is the opposite behavior  
404 observed for *Arousal*. These results indicate that being able to pass easily is more exciting, less pleasant and  
405 less dominating. This effect is perhaps grounded in the monetary reward participants could receive only  
406 when successfully passing through to the next room. Most importantly, however, the findings indicate that  
407 subjective reports differ significantly dependent on whether participants actively moved through the rooms  
408 or not implying an impact of action affective ratings of an environment. We speculate whether the  
409 omnipresent significant differences may be rooted in uniqueness of emotional states that varies from  
410 participant to participant. Such an account of emotional ratings is currently gaining credibility (51, 52).

411  
412 The time it took participants to reach the door after onset of the imperative color change varied according to  
413 the environmental affordance. Participants approached the *Wide* door significantly faster than *Mid* and *Narrow*  
414 doors, while there was no significant difference for *Mid* and *Narrow* transitions. While the *Wide* door clearly  
415 offered a passage without greater computational demands regarding the motor plan and execution, the *Mid*  
416 door width, being ambiguously wide/narrow, might have triggered motor processes simulating a transition to  
417 estimate whether the door was passable or not. In this sense, the *Mid* and *Narrow* doors, causing uncertainty,  
418 might have delayed approach times due to increasing processing demands. Admittedly, results derived from  
419 the approach time are limited, partly due to the caused fatigue of operating a physically demanding task for a  
420 relatively long time period, and partly due to the subjective manner and interpretation of passing a door that is

421 seemingly impossible to pass. This caused participants to develop different approach strategies which caused  
422 different delays. However, the fact that participants, in general, spent significantly more time approaching the  
423 *Narrow* doors compared to *Wide* doors provides sufficient guidance for the analyses of cortical measures  
424 associated with these differences.

425

## 426 **Cortical measures**

427

428 **Early evoked potentials.** As an initial insight into the association of affordances and cortical potentials, we  
429 analyzed the early visual-evoked potentials. We expected to find differences in the stimulus-locked ERP at  
430 occipital channels reflecting differences in sensory processing of affordance-related aspects of the transition.  
431 Importantly, based on the assumption of fast sensorimotor active inferences that should be reflected in  
432 action-directed stimulus processing influencing not only sensory but also motor-related activity, we  
433 hypothesized to also find differences in the ERP over motor areas in the same time window as sensory  
434 potentials (i.e., between 50 and 200 ms). As illustrated in the analysis, we found significant differences in  
435 amplitudes of the visually evoked P1 component over the central occipital electrode dependent on the  
436 affordance of the transition. In addition, in line with our hypothesis, we also found a difference over fronto-  
437 central leads starting around 50 ms and lasting until 200 ms after onset of the doors display. Taken together,  
438 no significant differences in peak amplitudes were found when comparing the passable *Mid* and *Wide* doors  
439 while peak amplitude associated with both door widths significantly differed from impassable *Narrow* doors.  
440 Note that the visual scene of the three doors are comparable as they contained same physical contrasts, and  
441 that participants at this point did not know whether to go or not as they were merely introduced to the setting  
442 they might have to pass in a couple of seconds. As no significant differences were found for *NoGo*, it  
443 functions as a matching control, and thus we can interpret the differences in *Go* as affordance manipulation.  
444 These results indicate that impassable doors with poor affordances produce significantly different early  
445 evoked potentials compared to passable doors particularly at fronto-central and occipital sites. Thus,  
446 environmental affordances, in terms of being able to program bodily trajectory to transit spaces, yield a  
447 significant measurable effect on early cortical potentials best pronounced over frontal and occipital sites at  
448 approximately 200ms after first view of the environment.

449

450 Considering the affordance-specific pattern observed for the early P1-N1-complex, prior studies have shown  
451 this visual evoked potential complex to reflect attentional processes associated with spatial or feature-based  
452 aspects of stimuli (53–57). Attended stimuli elicit larger P1-N1 amplitudes than unattended ones. Based on  
453 these findings, the results suggest that passable transitions were associated with increased attentional  
454 processing. Approaching the affordance-specific pattern of P1-N1-complex using active inferences (58), the  
455 difference confirms the assumption that perceptual processes co-vary with environmental affordances. In this  
456 sense, the amplitude difference might be credited to the process of active inference of whether the body can  
457 actively move and transit at all. This implies that visual attention is also guided by action-related properties of  
458 the environment and support the concept of fast, lower sensorimotor active inferences, explained as  
459 hierarchical and dynamic model of the world. Similar to HAC (31) and active inference (30, 59), these findings  
460 are in line with parallel cortical processes integrating sensory information to specify currently available  
461 affordances. Similarly, this means that, how one might act upon the environment is an ongoing process of  
462 affordances, taking place as early as perceptual processes, and which situates actions in an intimate position  
463 with perception. Such early processes are deeply involved in the impression of the environment for an agent  
464 pointing towards the importance of movement in cognition, and of how an agent enacts the world. Given  
465 affordances are processed at such an early stage, we speculate whether the impression of an environment

466 compose the immediate experience of the environment in a particular setting. Such an immediate experience  
467 fits with the term *atmospheres* as defined by Zumthor (60) “I enter a building, see a room, and – in a fraction  
468 of a second – have this feeling about it”, and thus relating the instantaneous emerging experience of space to  
469 affordances and action in general.  
470

471 **Motor-related potentials.** Although the ERP plots indicate an affordance-trend of the EPIC, statistical tests  
472 revealed no significant differences. However, *Narrow* door width elicited the greatest amplitude, both in case  
473 of anterior positivity and posterior negativity. In line with prediction errors and affordances, the increased  
474 amplitude associated with *Narrow* transitions can be interpreted as a reflection of the body simply not fitting,  
475 and yet forced to interact with the transition. Recall that prior to the imperative stimulus, participants have  
476 been standing for 6 s ( $\sigma = 1$  s). The EPIC may have an influence on the PINV. The nature of the PINV  
477 component is not as well investigated as other ERP components, limiting the reliability of an interpretation  
478 based on only a few studies that treat the component as modality-unspecific, and rather “*consider the PINV*  
479 *as an electrocortical correlate of a cognitive state*” (61). Since the study by Gauthier and Gottesmann (62)  
480 the PINV, similar to affordances, has been hypothesized to act as a marker of change in psychophysiological  
481 state. Ever since, the PINV has been used to investigate depression, schizophrenia, learned helplessness and  
482 loss of control (40–42, 63, 64). Results show depressive and schizophrenic participants to exhibit an  
483 increased PINV that is explained as increased vulnerability for loss of control, as well as increased  
484 anticipation for future affective events (40, 42, 50). If an increased PINV reflects increased vulnerability for  
485 future events, as we observed for impassable doors, then the component, constituted by continuous motor  
486 potential activity, sheds new light on affordances as an intrinsic affective property of action itself. Casement  
487 and colleagues (42) even suggested the PINV to depend on lack of control as the state of having no  
488 influence; depriving the potential to act. This could explain the difference in the *Narrow* condition, as  
489 participants were instructed to attempt to pass at all times until failure leading to a sense of loss of control.  
490 Only in cases of *Go* did we observe a difference in the PINV component, which varied similar to the P1-N1-  
491 complex. Amplitudes of the component for *Narrow* doors were significantly different from *Mid* and *Wide*  
492 doors, while the passable conditions did not differ from one another. Further, there were no significant  
493 differences in the PINV component in cases of *NoGo*, emphasizing the importance of the motor execution  
494 itself to evoke the PINV component. These results point towards the PINV component as an expression of  
495 willingness to execute an act restricted beyond ones’ own control, i.e. a designed environment. Thus, the PINV  
496 might serve as an excellent marker for affordances.

497 The presented results of the PINV are consistent with the observed increase in activity over fronto-central sites  
498 by Bozzacchi et al. (39). Bozzacchi and colleagues concluded that the meaning of the action and awareness of  
499 being able to act – affordances – affect action preparation, which is here understood as the motor-related  
500 potential prior to movement onset. We argue that the PINV component might reflect a willingness, or even  
501 intentional, aspect of affordances. This would mean that the PINV is not modulated by the perception (that the  
502 door is a different visual information), but reveals something about the intention of movement – which we  
503 translate to affordances. For this reason, we find significant differences in cases of *Go*, but not in *NoGo*, and  
504 further for passable compared to impassable. In light of HAC (31), a potential explanation for the absence of  
505 differences in the *NoGo* trials, is related to the immediate action selection, which in all cases (*Narrow*, *Mid*  
506 and *Wide*) is a simple turn to answer the questionnaire, and thus present the participant with identical  
507 affordances. When instead given a *Go*, cortical processes require an action selection related to the anticipated  
508 motor trajectory, which differs according to the affordances of the door width. Regarding the temporal aspect  
509 of transitioning to the next room, HAC suggests the higher levels bias the lower level competitions, which  
510 operate at the level of action itself, through a cascade of expected next affordances. The lower levels have a

511 continuous competition of how to satisfy the higher expectations. Action selection, executed while unfolding  
512 the planned movements in a continuous manner, depend on the expectation of next affordances. Taken  
513 together, the post-hoc analyses revealed differences grouped for passable as compared to impassable doors  
514 throughout all channels, except for *Pz*. We do not observe any differences between *Mid-Wide*, but find  
515 significant differences between *Narrow-Mid* and *Narrow-Wide*. The greatest differences were found over  
516 fronto-central and occipital sites. Similar to the early evoked potentials, these results indicate that  
517 environmental affordances impact neural activity prior to action depending on whether one has to act or not.  
518

519 Notably, regarding architectural experience, since the PINV component was only expressed in the *Go*  
520 condition (forced interaction with the environment), these findings support the importance of movement for  
521 architectural experience, in a sense that action or even only the perception of action possibilities alters brain  
522 activity. Visually guiding and propelling the body in space greatly influences the continuous emerging of  
523 affordances, which in turn affect the human experience. We found differences in fronto-central and occipital  
524 areas, prior to movement through space with the post-imperative negative going waveform most pronounced  
525 over *FCz* indicated an involvement of the supplementary motor area (SMA) as reported by Bozzacchi et al.  
526 (39). Interestingly, earlier studies showed involvement of SMA in visually guided actions (65), which is the  
527 essence of active inferences. The PINV can be generated independently from the re-afferent signal, which is,  
528 in terms of active inference, understood as ascending (bottom-up) proprioceptive prediction-errors (66). This  
529 suggests the PINV component might reflect descending (top-down) predictions, rendering SMA as an essential  
530 area of action-perception loop, and thus crucial for processing continuous affordances. This account might  
531 resolve the finding of fronto-central differences in *Go* trials only. The SMA is anatomically bridging the frontal  
532 cortex with motor cortex – perhaps also functionally as argued by Adams et al. (66), as this anatomical nature  
533 fits with the proposed hierarchical characteristics of forward and backward projections in active inferences.  
534

## 535 CONCLUSION

536 The present study provides strong evidence for affordances to be processed as early as perceptual processes,  
537 linking action and perception in a similar manner to active inference. The results points towards a conception  
538 of the brain that seems to deal with “how can I act” while in parallel processes referring to “what do I perceive”  
539 take place. The results thus support the assumption that perception of the environment is influenced by  
540 affordances and action itself – hence, affordances and action can influence experience of an environment. Due  
541 to the importance of affordances and action for brain dynamics, this further emphasizes and qualifies the  
542 general idea of enactivism as a holistic approach to investigate cognition. We do not claim that architectural  
543 affordances are directly represented as a specific event-related potential component; however, we provide  
544 evidence for an action-perception account of cognition, which systematically differentiates according to the  
545 definition of affordances.

546 The nature of the analyzed brain activity emphasizes the importance of the intentional movement. Our results  
547 are consistent with the concept of continuous affordances as explained by active inferences. In terms of  
548 architecture, the results shed light on why transitions have been a constant throughout the history of  
549 architecture, perhaps especially in religious and other buildings that actively aimed at producing a certain  
550 experience of presence. Thus, the fact that we are predictive beings, in terms of architecture, means we should  
551 take into consideration how bodily movement alters perception. By altering perception, this would ultimately  
552 lead spaces to have a potentially physiological impact on users. Much remains to be uncovered in architectural  
553 cognition. Moving and transitioning in space, is continuously constructing a prediction of a world, a world that  
554 we perceive dependent on our action potentials, which informs brain, body and mind. Transitions in  
555 architecture form a holistic entity of architectural experience expressed as the unfolding of motor planning,

556 spatial sequences and predictive mechanisms. Similar to Zeki (67), we speculate whether the ancient interest  
557 in tailoring transitions and sequences may have developed as a trial-and-error of active-narration, perhaps  
558 rooted in ancient knowledge of the predictive mind and action-perception parallel processing nature of the  
559 human being.

560  
561 **ACKNOWLEDGEMENTS.** We thank Lukas Gehrke, Marius Klug and Federica Nenna for their support  
562 with the technical setup. We thank in particular Federica Nenna for her additional support in conducting the  
563 experiment. In addition, we would like to thank Andrea Jelic for important discussions and bringing essential  
564 insights of enactivism to our knowledge.

565  
566 **COMPETING INTERESTS.** The authors declare no competing interests.

567  
568

569

570 **REFERENCES**

- 571
- 572 1. Gibson J The Ecological Approach to Visual  
573 Perception. *Hought Mifflin- Bost.* (1979).  
574 2. Clark A An embodied cognitive science? *Trends*  
575 *Cogn Sci* 3(9):345–351. (1999).  
576 3. Clark A *Surfing Uncertainty: Prediction, Action and*  
577 *the embodied mind* (Oxford University Press, New  
578 York) (2015).  
579 4. Friston KJ, Kilner J, Harrison L A free energy  
580 principle for the brain. *J Physiol* 100(1–3):70–87.  
581 (2006).  
582 5. Hohwy J *The Predictive Mind* (Oxford University  
583 Press)  
584 doi:10.1093/acprof:oso/9780199682737.001.0001  
585 (2013).  
586 6. Friston K The free-energy principle: a unified brain  
587 theory? *Nat Rev Neurosci* 11(2):127–138. (2010).  
588 7. Friston K The free-energy principle: a rough guide  
589 to the brain? *Trends Cogn Sci* 13(7):293–301.  
590 (2009).  
591 8. Friston K, Mattout J, Kilner J Action understanding  
592 and active inference. *Biol Cybern* 104(1–2):137–  
593 160. (2011).  
594 9. Friston K Learning and inference in the brain.  
595 *Neural Networks* 16(9):1325–1352. (2003).  
596 10. Clark A Whatever next? Predictive brains, situated  
597 agents, and the future of cognitive science. *Behav*  
598 *Brain Sci* 36(3):181–204. (2013).  
599 11. OED *Oxford English Dictionary* (Oxford University  
600 Press, Oxford) (2018).  
601 12. Fazio MW, Moffett M, Wodehouse L *A world*  
602 *history of architecture* (Laurence King). 2nd Ed.  
603 (2008).  
604 13. Norberg-Schulz C *Intentions in architecture.* (MIT  
605 Pr) (1965).  
606 14. Pallasmaa J *The Embodied Image: Imagination and*  
607 *Imagery in Architecture* (Wiley) (2011).  
608 15. Palladio A *The four books on architecture* (MIT  
609 Press) Available at: [https://www.saxo.com/dk/the-](https://www.saxo.com/dk/the-four-books-on-architecture_andrea-palladio_paperback_9780262661331)  
610 [four-books-on-architecture\\_andrea-](https://www.saxo.com/dk/the-four-books-on-architecture_andrea-palladio_paperback_9780262661331)  
611 [palladio\\_paperback\\_9780262661331](https://www.saxo.com/dk/the-four-books-on-architecture_andrea-palladio_paperback_9780262661331) [Accessed  
612 October 20, 2018] (1997).  
613 16. Vitruvius, Morgan MH (Morris H *Vitruvius : the ten*  
614 *books on architecture* (Dover Publications)  
615 Available at: [https://www.saxo.com/dk/on-](https://www.saxo.com/dk/on-architecture-bks-i-x_vitruvius_paperback_9780486206455)  
616 [architecture-bks-i-](https://www.saxo.com/dk/on-architecture-bks-i-x_vitruvius_paperback_9780486206455)  
617 [x\\_vitruvius\\_paperback\\_9780486206455](https://www.saxo.com/dk/on-architecture-bks-i-x_vitruvius_paperback_9780486206455) [Accessed  
618 October 20, 2018] (1960).  
619 17. Rasmussen SE *Experiencing architecture* (Chapman  
620 & Hall, London) (1959).  
621 18. Moretti L, Bucci F, Mulazzani M, DeConciliis M  
622 *Luigi Moretti: Works and writings* (Princeton  
623 Architectural Press) (2002).  
624 19. Arnheim R *The Dynamics of Architectural Form*  
625 (University of California Press) (1977).  
626 20. Boettger T *Threshold Spaces : transitions in*  
627 *architecture analysis and design tools* (Birkhäuser,  
628 Weimar) (2014).  
629 21. Jelić A, Tieri G, Matteis F De, Babiloni F, Vecchiato  
630 G The Enactive Approach to Architectural  
631 Experience: A Neurophysiological Perspective on  
632 Embodiment, Motivation, and Affordances. *Front*  
633 *Psychol* 7:481. (2016).  
634 22. Holl S, Pallasmaa J, Pérez-Gómez A *Questions of*  
635 *perception : phenomenology of architecture*  
636 (William Stout Publishers, San Francisco) Available  
637 at: <http://catalog.hathitrust.org/Record/008231335>  
638 (2006).  
639 23. Bachelard G *The poetics of space* (Beacon Press)  
640 (1969).  
641 24. Norberg-Schulz C *Nightlands* (MIT Press,  
642 Cambridge, Mass. ; London) (1997).  
643 25. Coburn A, Vartanian O, Chatterjee A Buildings,  
644 Beauty, and the Brain: A Neuroscience of  
645 Architectural Experience. *J Cogn Neurosci*  
646 29(9):1521–1531. (2017).  
647 26. Varela FJ, Thompson E, Rosch E *The embodied*  
648 *mind: cognitive science and human experience*  
649 Available at:  
650 <https://mitpress.mit.edu/books/embodied-mind-0>  
651 [Accessed December 6, 2017] (1991).  
652 27. Thompson E *Mind in life: biology, phenomenology,*  
653 *and the sciences of mind* (Belknap Press of Harvard

- 654 University Press) Available at: 697  
655 <http://www.hup.harvard.edu/catalog.php?isbn=9780> 698  
656 674057517 [Accessed December 6, 2017] (2007). 699 40.  
657 28. Maturana HR, Varela FJ *The tree of knowledge: the* 700  
658 *biological roots of human understanding* 701  
659 (Shambhala) (1992). 702  
660 29. Gallagher S *Enactivist interventions: rethinking the* 703  
661 *mind* (Oxford University Press). 1st Ed. (2017). 704 41.  
662 30. Kiebel SJ, Daunizeau J, Friston KJ A Hierarchy of 705  
663 Time-Scales and the Brain. *PLoS Comput Biol* 706  
664 4(11):e1000209. (2008). 707 42.  
665 31. Pezzulo G, Cisek P Navigating the Affordance 708  
666 Landscape: Feedback Control as a Process Model of 709  
667 Behavior and Cognition. *Trends Cogn Sci* 710 43.  
668 20(6):414–424. (2016). 711  
669 32. Makeig S, Gramann K, Jung T-P, Sejnowski TJ, 712  
670 Poizner H Linking brain, mind and behavior. *Int J* 713 44.  
671 *Psychophysiol* 73(2):95–100. (2009). 714  
672 33. Gramann K, et al. Cognition in action: imaging 715  
673 brain/body dynamics in mobile humans. *Rev* 716 45.  
674 *Neurosci* 22(6):593–608. (2011). 717  
675 34. Gramann K, Jung T-P, Ferris DP, Lin C-T, Makeig 718 46.  
676 S Toward a new cognitive neuroscience: modeling 719  
677 natural brain dynamics. *Front Hum Neurosci* 8:444. 720  
678 (2014). 721  
679 35. Luck SJ, Kappenman ES *Oxford Handbook of* 722 47.  
680 *Event-Related Potential Components* (Oxford 723  
681 University Press, USA, New York) Available at: 724  
682 <http://replace-me/ebRARYid=11304148> (2011). 725  
683 36. Kornhuber HH, Deecke L Brain potential changes in 726  
684 voluntary and passive movements in humans: 727 48.  
685 readiness potential and reafferent potentials. 728  
686 *Pflügers Arch - Eur J Physiol* 468(7):1115–1124. 729  
687 (2016). 730  
688 37. Brunia CHM CNV and SPN: Indices of Anticipatory 731  
689 Behavior. *The Bereitschaftspotential* (Springer US, 732 49.  
690 Boston, MA), pp 207–227. (2003). 733  
691 38. Di Russo F, et al. Beyond the 734  
692 “Bereitschaftspotential”: Action preparation behind 735 50.  
693 cognitive functions. *Neurosci Biobehav Rev* 78:57– 736  
694 81. (2017). 737  
695 39. Bozzacchi C, Giusti MA, Pitzalis S, Spinelli D, 738  
696 Russo F Di Awareness affects motor planning for 739  
goal-oriented actions. *Biol Psychol* 89(2):503–514.  
(2012).
40. Diener C, Kuehner C, Brusniak W, Struve M, Flor H  
Effects of stressor controllability on  
psychophysiological, cognitive and behavioural  
responses in patients with major depression and  
dysthymia. *Psychol Med* 39(1):77–86. (2009).
41. Elbert T, Rockstroh B, Lutzenberger W, Birbaumer  
N Slow brain potentials after withdrawal of control.  
*Arch Psychiatr Nervenkr* 232(3):201–214. (1982).
42. Casement MD, et al. Anticipation of affect in  
dysthymia: behavioral and neurophysiological  
indicators. *Biol Psychol* 77(2):197–204. (2008).
43. Bradley MM, Lang PJ Measuring emotion: the Self-  
Assessment Manikin and the Semantic Differential.  
*J Behav Ther Exp Psychiatry* 25(1):49–59. (1994).
44. Gramann K, Ferris DP, Gwin J, Makeig S Imaging  
natural cognition in action. *Int J Psychophysiol*  
91(1):22–9. (2014).
45. Kothe C LabStreamingLayer. Available at:  
<https://github.com/sccn/labstreaminglayer> (2014).
46. Delorme A, Makeig S EEGLAB: an open source  
toolbox for analysis of single-trial EEG dynamics  
including independent component analysis. *J*  
*Neurosci Methods* 134(1):9–21. (2004).
47. Palmer JA, Kreutz-Delgado K, Makeig S AMICA:  
*An Adaptive Mixture of Independent Component*  
*Analyzers with Shared Components* Available at:  
[https://sccn.ucsd.edu/~jason/amica\\_a.pdf](https://sccn.ucsd.edu/~jason/amica_a.pdf) [Accessed  
September 1, 2018] (2011).
48. Bozzacchi C, Spinelli D, Pitzalis S, Giusti MA, Di  
Russo F I know what I will see: action-specific  
motor preparation activity in a passive observation  
task. *Soc Cogn Affect Neurosci* 10(6):783–789.  
(2015).
49. van Boxtel GJM, Böcker KBE Cortical Measures of  
Anticipation. *J Psychophysiol* 18(2/3):61–76.  
(2004).
50. Klein C, Rockstroh B, Cohen R, Berg P Contingent  
negative variation (CNV) and determinants of the  
post-imperative negative variation (PINV) in  
schizophrenic patients and healthy controls.  
*Schizophr Res* 21(2):97–110. (1996).



- 740 51. Barrett LF *How emotions are made: the secret life of* 767 60. Zumthor P *Atmospheres* (Birkhäuser, Basel) (2006).  
741 *the brain* (Houghton Mifflin Harcourt, New York) 768 61. Rockstroh B, Cohen R, Berg P, Klein C The  
742 (2017). 769 postimperative negative variation following  
743 52. Barrett LF, Bar M See it with feeling: affective 770 ambiguous matching of auditory stimuli. *Int J*  
744 predictions during object perception. *Philos Trans R* 771 *Psychophysiol* 25(2):155–167. (1997).  
745 *Soc B Biol Sci* 364(1521):1325–1334. (2009). 772 62. Gauthier P, Gottesmann C Communications in  
746 53. Hillyard SA, Anllo-Vento L Event-related brain 773 Electroencephalography. *Electroencephalography*  
747 potentials in the study of visual selective attention. 774 *and Clinical Neurophysiology* (Elsevier), pp 534–  
748 *Proc Natl Acad Sci U S A* 95(3):781–7. (1998). 775 535. (1977).  
749 54. Posner MI, Dehaene S Attentional networks. *Trends* 776 63. Kathmann N, Jonitz L, Engel RR Cognitive  
750 *Neurosci* 17(2):75–9. (1994). 777 Determinants of the Postimperative Negative  
751 55. Mangun GR, Hopfinger JB, Heinze H-J Integrating 778 Variation. *Psychophysiology* 27(3):256–263. (1990).  
752 electrophysiology and neuroimaging in the study of 779 64. Klepeis N, et al. The National Human Activity  
753 human cognition. *Behav Res Methods, Instruments,* 780 Pattern Survey (NHAPS): a resource for assessing  
754 *Comput* 30(1):118–130. (1998). 781 exposure to environmental pollutants. *J Expo Anal*  
755 56. Gramann K, Töllner T, Müller HJ Dimension-based 782 *Environ Epidemiol* 11(3):231–252. (2001).  
756 attention modulates early visual processing. 783 65. Picard N, Strick PL Activation of the Supplementary  
757 *Psychophysiology* 47(5):968–78. (2010). 784 Motor Area (SMA) during Performance of Visually  
758 57. Gramann K, Toellner T, Krummenacher J, Eimer M, 785 Guided Movements. *Cereb Cortex* 13(9):977–986.  
759 Müller HJ Brain electrical correlates of dimensional 786 (2003).  
760 weighting: An ERP study. *Psychophysiology* 787 66. Adams RA, Shipp S, Friston KJ Predictions not  
761 44(2):277–292. (2007). 788 commands: active inference in the motor system.  
762 58. Friston KJ, et al. Dopamine, Affordance and Active 789 *Brain Struct Funct* 218(3):611–643. (2013).  
763 Inference. *PLoS Comput Biol* 8(1):e1002327. 790 67. Zeki S Art and the Brain. *Dædalus* 127(2):71–103.  
764 (2012). 791 (1998).  
765 59. Friston KJ Active inference and free energy. *Behav* 792  
766 *Brain Sci* 36(3):212–213. (2013).

## 794 Figure legends

795

### 796 Figure 1

797 Fig. 1 – (A) Participants were instructed to stand in the start-square. A black sphere would restrict their vision to pure black for 3  
798 seconds,  $\sigma = 1$ . The moment the black sphere disappears, participants perceive the door they have to pass. They wait for the  
799 imperative stimulus, either a green door (Go) or a red door (NoGo), for 6 seconds,  $\sigma = 1$ . In case of Go, participants were instructed  
800 to pass the opening, virtually touch the red circle, which in turn would release a monetary bonus, return to start square and answer the  
801 virtual SAM questionnaire. In case of NoGo, participants were instructed to turn around and answer the virtual SAM. (B) The three  
802 different doors were dimensioned as following *Narrow* 0.2 meter, *Mid* 1 meter and *Wide* 1.5 meters. Note the color code for each  
803 door as they are used throughout the paper. (C) The diagrammatic timeline depicts a the sequences of events for a single trial in  
804 conceptual manner.

805

### 806 Figure 2

807 Fig. 2 – Mobile Brain/Body Imaging setup. The participants wore a backpack, carrying a high-performance gaming computer (Zotac,  
808 Cyan color), powered by two batteries (Red color). An EEG amplifier (ANT eegoSports, Yellow color) was attached to the backpack  
809 and connected to the computer. The participants wore a VR head mounted display (Windows mixed reality) on top of a 64 channel  
810 cap. This setup allowed participants to freely move around while recording data.

811

### 812 Figure 3

813 Fig. 3 – Box plot of the SAM questionnaire results for the three different SAM scales (*arousal*, *dominance*, and *valence*) as a  
814 function of the door width (*Narrow*, *Mid*, *Wide*). The left column displays the pictorial representation of the SAM manikin for the  
815 highest value of each condition presented. The middle column displays the SAM ratings for the Go condition. The right column  
816 displays the SAM ratings for the NoGo-condition. Means are indicated by dashed line, while medians are solid line. Adjusted p  
817 values are reported.

818

### 819 Figure 4

820 Fig. 4 – Rain-cloud plot of approach times for each door width condition. Post-hoc comparisons using Tukey test are displayed with  
821 a dot  $< 0.1$  and  $* < 0.05$  and  $*** < 0.001$ . Means are indicated by dashed line, while medians are displayed as solid lines.

822

### 823 Figure 5.1

824 Fig. 5.1 – Three time-locked ERPs ( $FCz$ ,  $Pz$  and  $Oz$ ) at the onset of “Lights On” event. *Narrow* condition in yellow, *Mid* condition in  
825 blue and *Wide* condition in red. Two time windows are indicated with dashed-lines and grey transparent box. The first time window  
826 (50 – 200 ms) mark the anterior N1 and posterior P1, while the second window (140 – 290 ms) mark the anterior P1 and posterior  
827 N1. The components are marked with arrows.

828

### 829 Figure 6

830 Fig. 6 – **Posterior P1.** Rain-cloud plot of detected mean amplitude of positive peak in time-locked event “Lights on” in the time  
831 range of 50 to 200 ms for  $Pz$ ,  $POz$  and  $Oz$ . Means are indicated by dashed line, while medians are solid line. Significance is  
832 calculated using Tukey HSD. We observed significant differences for  $Oz$  between *Narrow-Mid* ( $p = 0.0021$ ) and *Narrow-Wide* ( $p =$   
833  $0.0065$ ), while for  $POz$  in *Narrow-Wide* revealed significant difference ( $p = 0.028$ ), however no significant differences were  
834 observed in other electrodes and other contrasts. **Posterior N1.** Rain-cloud plot of detected mean amplitude of negative peak in time-  
835 locked event “Lights on” in the time range of 140 to 290 ms for  $Pz$ ,  $POz$  and  $Oz$ . We observed significant differences only for  $Oz$  in  
836 *Narrow-Mid* ( $p = 0.0113$ ) and *Narrow-Wide* ( $p = 0.0372$ ). **Anterior N1.** Rain-cloud plot of detected mean amplitude of negative  
837 peak in time-locked event “Lights on” in the time range of 50 to 200 ms for  $Fz$ ,  $FCz$  and  $Cz$ . We observed no significant differences  
838 for any electrode. **Anterior P1.** Rain-cloud plot of detected mean amplitude of negative peak in time-locked event “Lights on” in the  
839 time range of 140 to 290 ms for  $Fz$ ,  $FCz$  and  $Cz$ . We observed significant differences in all electrodes in *Narrow-Wide*, with the  
840 exception of only a tendency in  $Fz$  ( $p = 0.0717$ ),  $FCz$  ( $p = 0.0071$ ) and  $Cz$  ( $p = 0.0214$ ). **Double plot.** Frontal (dashed-line) and  
841 posterior (solid-line) time-locked ERPs ( $Fz$  and  $Oz$ ) at the onset of “Lights On” event. *Narrow* condition in yellow, *Mid* condition in  
842 blue and *Wide* condition in red. Two time windows are indicated with dashed-lines and grey transparent box. The first time window  
843 (50 – 200 ms) mark the anterior N1 and posterior P1, while the second window (140 – 290 ms) mark the anterior P1 and posterior  
844 N1.

845

### 846 Figure 7.1

847 Fig. 7 – Three time-locked ERPs ( $FCz$ ,  $Pz$  and  $Oz$ ) at the onset of Go/NoGo. *Narrow* condition in yellow, *Mid* condition in blue and  
848 *Wide* condition in red. The time window, indicated with dashed-lines and grey transparent box, illustrates the selected time window  
849 to analyze the MRCP by a global 2 x 3 x 6 factorial repeated measures ANOVA. Anterior and posterior PINV are marked with  
850 arrows.  
851

### 852 **Figure 8.1**

853 Fig. 8.1 – Rain-cloud plots of mean amplitude of negative development in time-locked event of Go/NoGo in the time range of 600 to  
854 800 ms for  $FCz$ ,  $Pz$  and  $Oz$ . Means are indicated by dashed line, while medians are solid line. The Tukey HSD contrast revealed  
855 differences only in  $FCz$  and  $Oz$ , and between *Narrow-Mid* for  $FCz$  ( $p = 0.0059$ ) and for  $Oz$  ( $p < 0.0001$ ), and between *Narrow-Wide*  
856 for  $FCz$  ( $p = 0.0323$ ) and for  $Oz$  ( $p < 0.0001$ ). No differences were observed for NoGo.  
857

858

859

## 860 **Supplementary figure legends**

861

### 862 **Figure 5.2 – supplementary**

863 Fig. 5.2 – ERP plots of “Lights On” stimulus for all six channels (*Fz, FCz, Cz, Pz, POz* and *Oz*). *Narrow* condition in yellow, *Mid*  
864 condition in blue and *Wide* condition in red. N1-P1-complex are marked with arrows.

865

### 866 **Figure 7.2 - supplementary**

867 Fig. 10 – ERP plots of the total six channels only for Go trials. ANOVA with repeated measures of time-locked ERP, where the  
868 increasing darkness behind the plots indicates the increasing level of significance. The repeated measures ANOVA revealed *Fz* ( $F_{2,36}$   
869 = 4.546,  $p = 0.0174$ ), *FCz* ( $F_{2,36} = 7.116$ ,  $p = 0.0025$ ), *Cz* ( $F_{2,36} = 4.116$ ,  $p = 0.0236$ ), *Pz* ( $F_{2,36} = 0.089$ ,  $p = 0.915$ ), *POz* ( $F_{2,36} =$   
870 1.708,  $p = 0.196$ ) and *Oz* ( $F_{2,36} = 14.39$ ,  $p < 0.0001$ ). We observed no difference for NoGo – however, we observed a difference  
871 within frontocentral and occipital sites for Go trials.

872

### 873 **Figure 8.2 – supplementary**

874 Fig. 11 – Rain-cloud plot of the mean amplitude of selected six channels between 600 – 800 ms post imperative stimulus – PINV  
875 component. Means are indicated by dashed line, while medians are solid line. We compared (Tukey test) the *Width* within Go and  
876 NoGo conditions, and observed only significant differences for Go condition. We observed differences within frontocentral and  
877 occipital sites.

878

879 **Figures**

880

881 **Figure 1:**

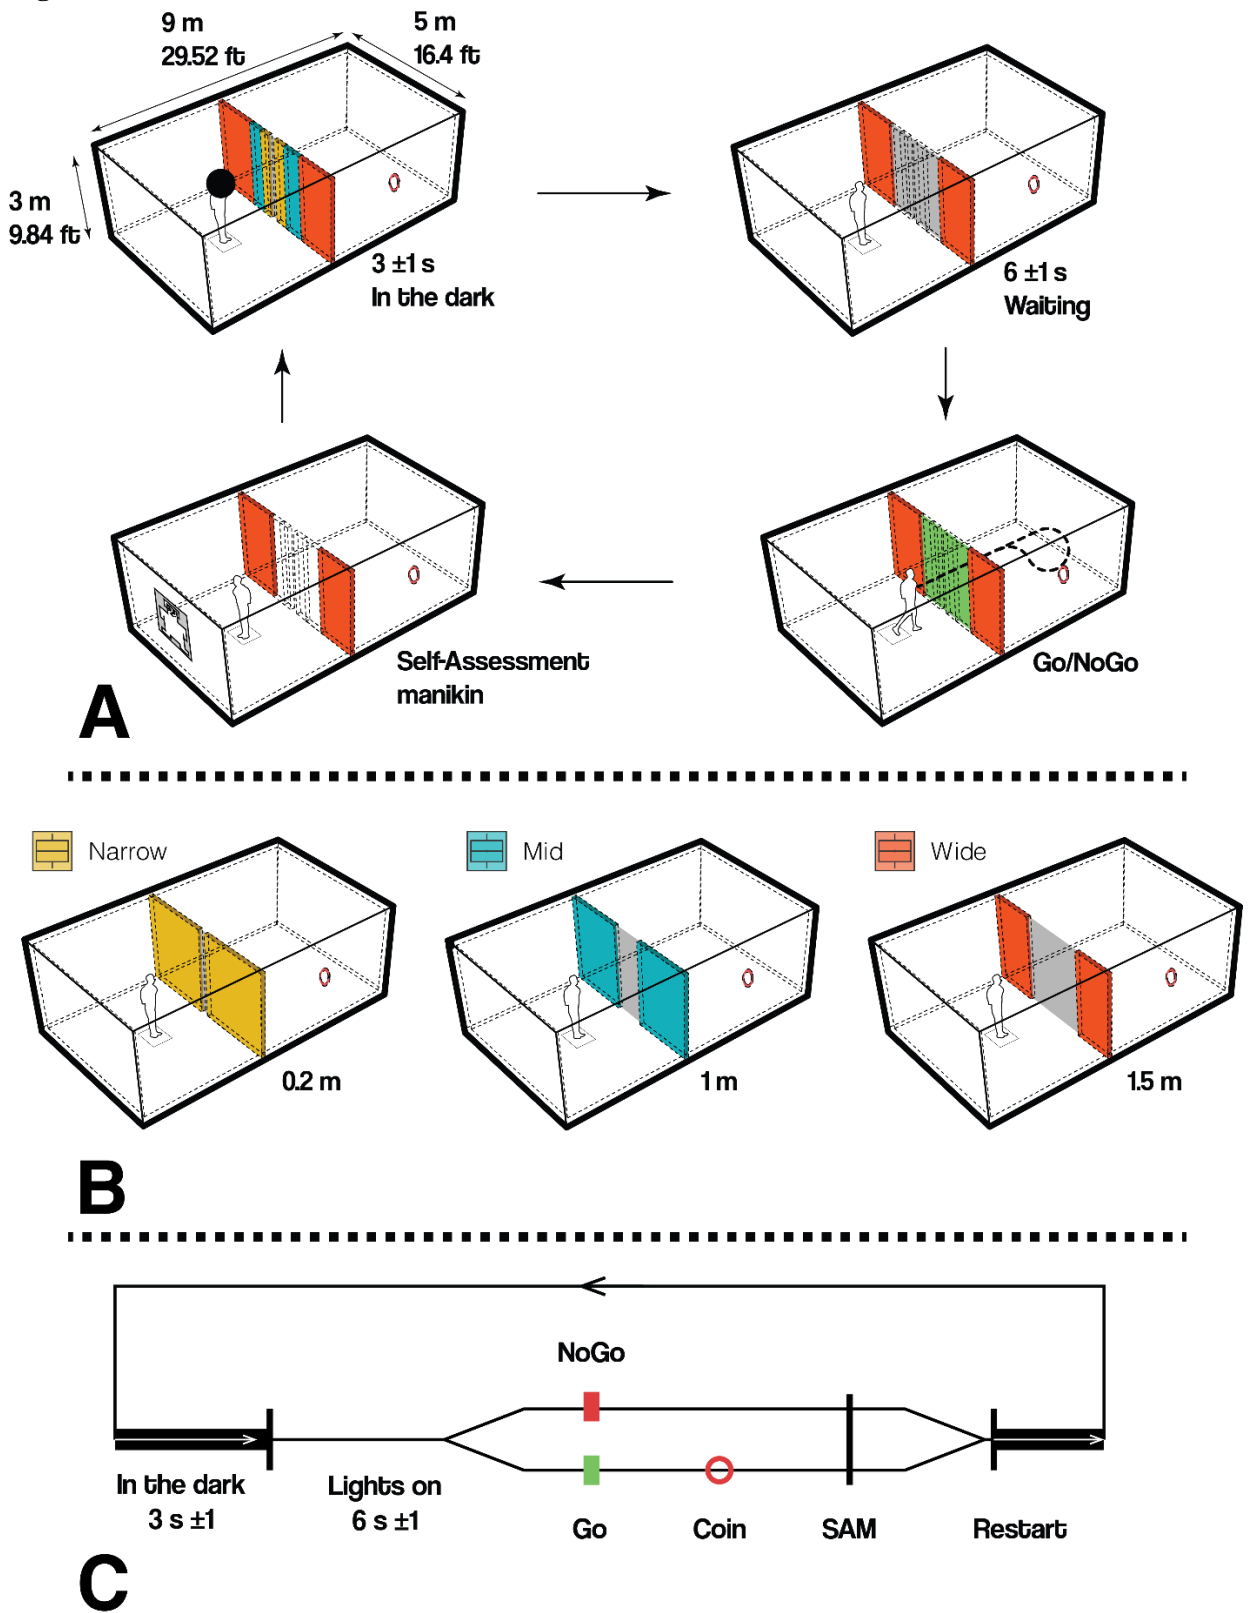

882

883 **Figure 2:**

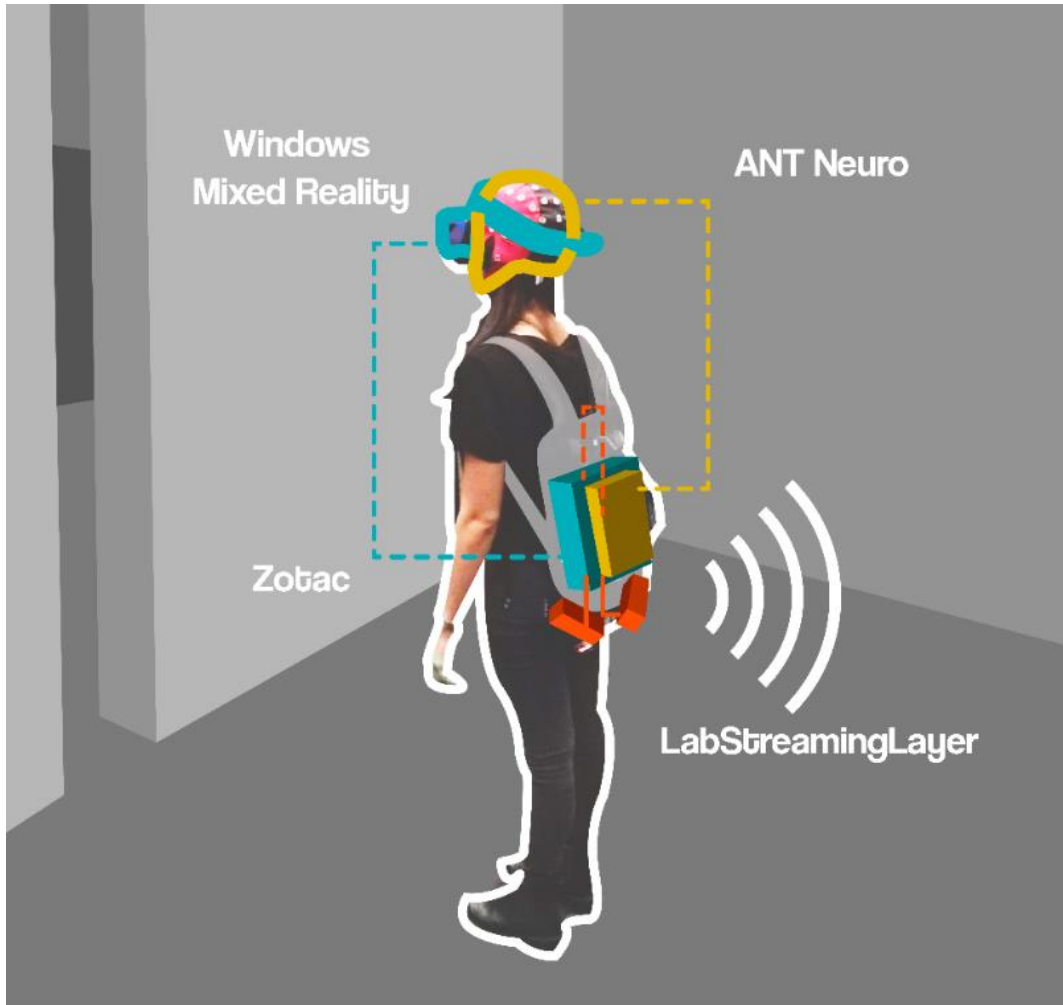

884  
885

886 **Figure 3:**

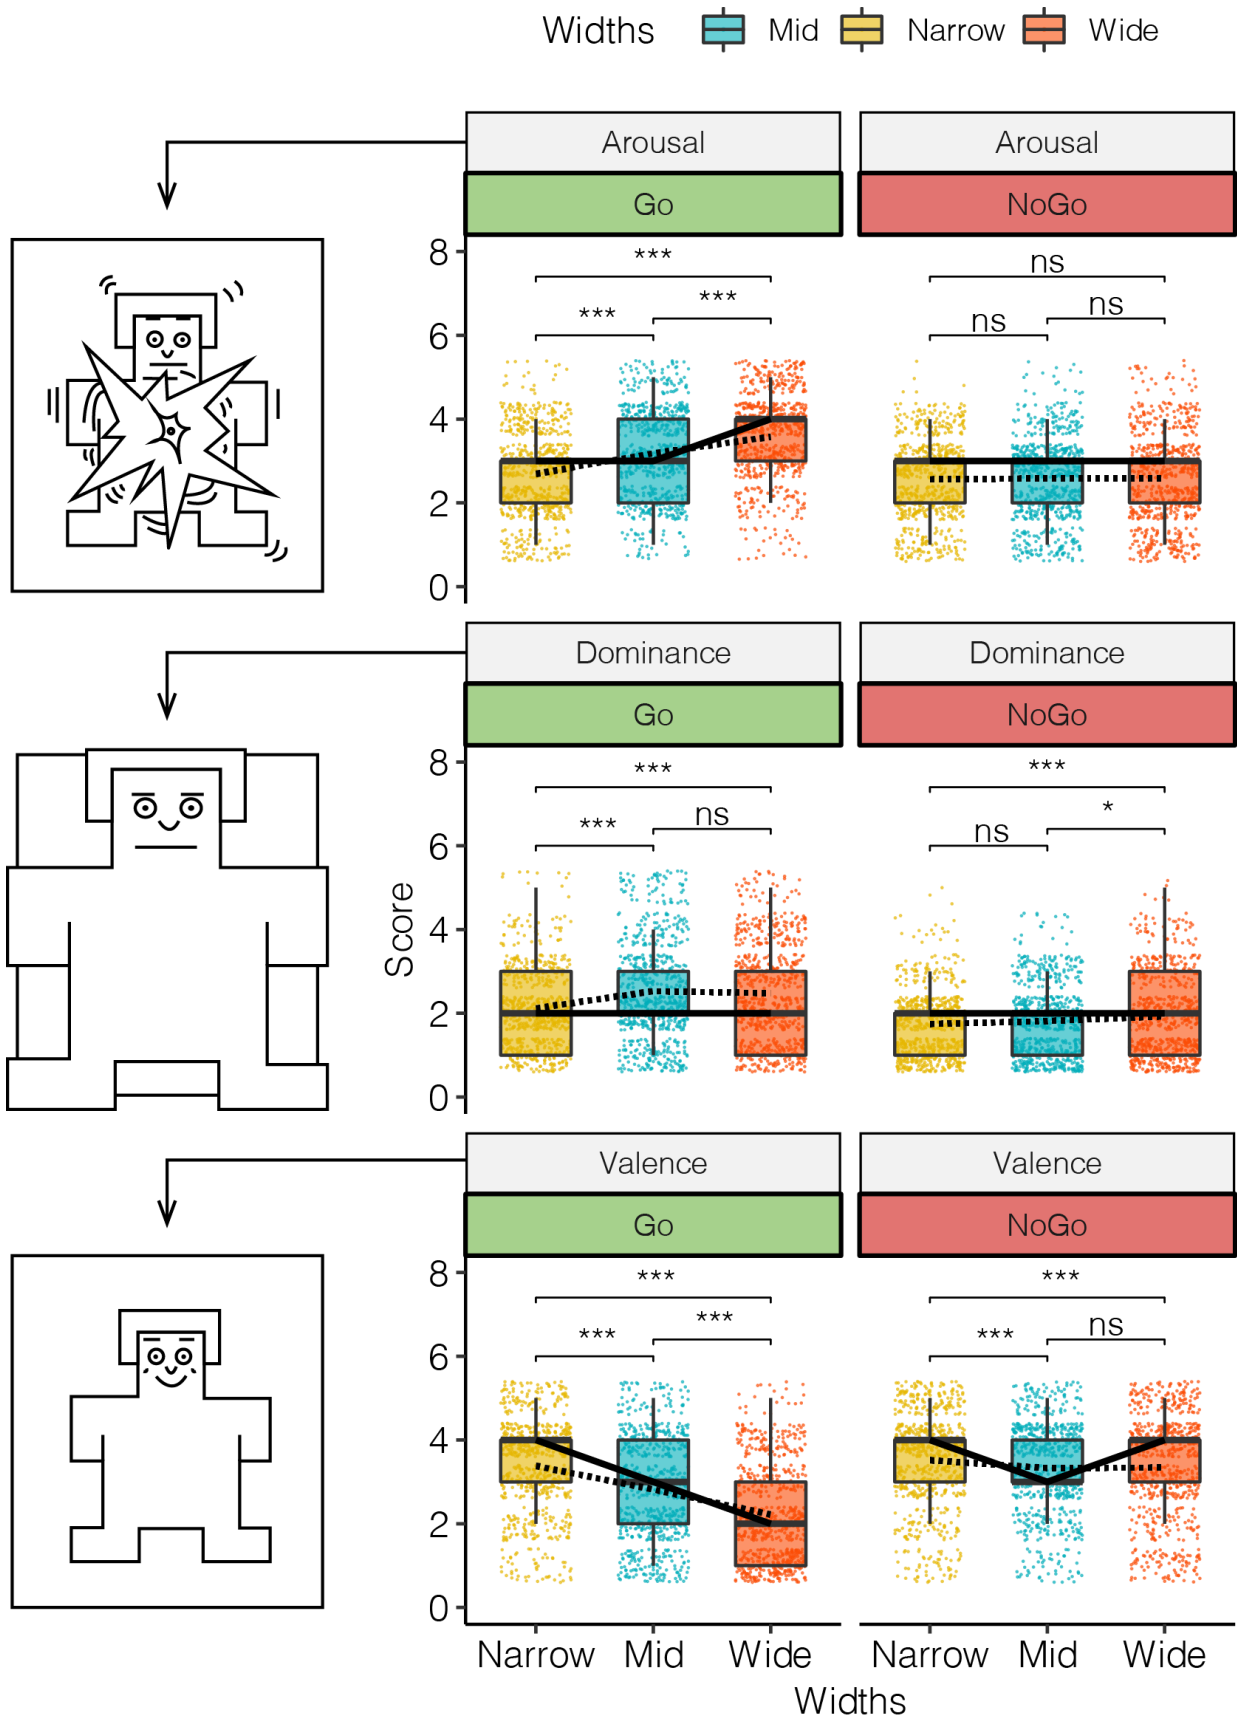

887

888 **Figure 4:**

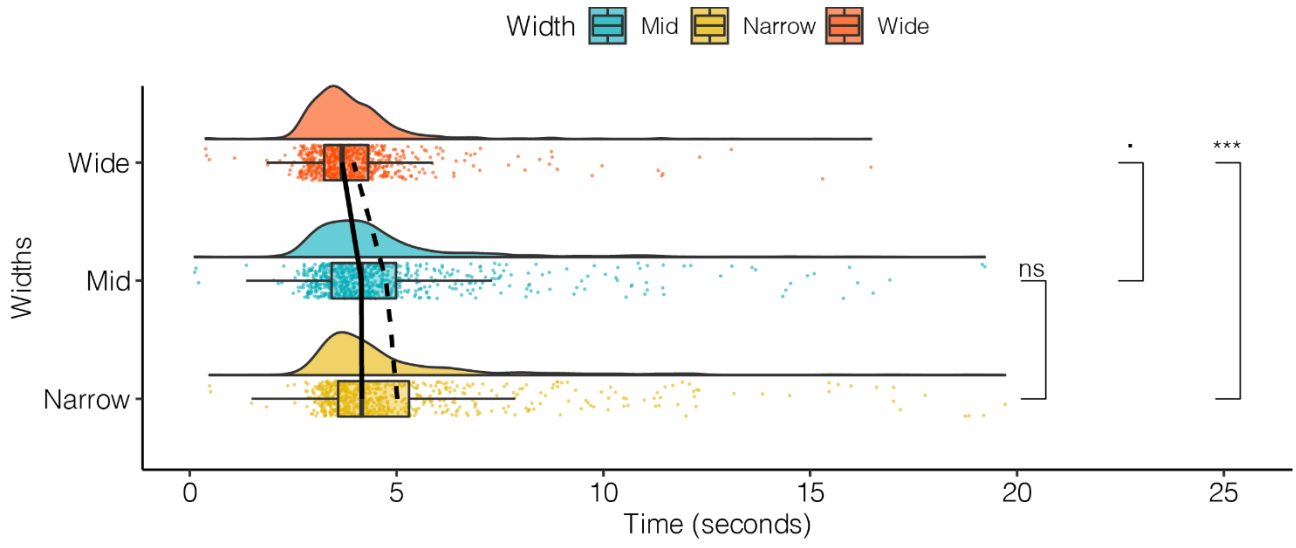

889  
890



891 **Figure 5.1:**

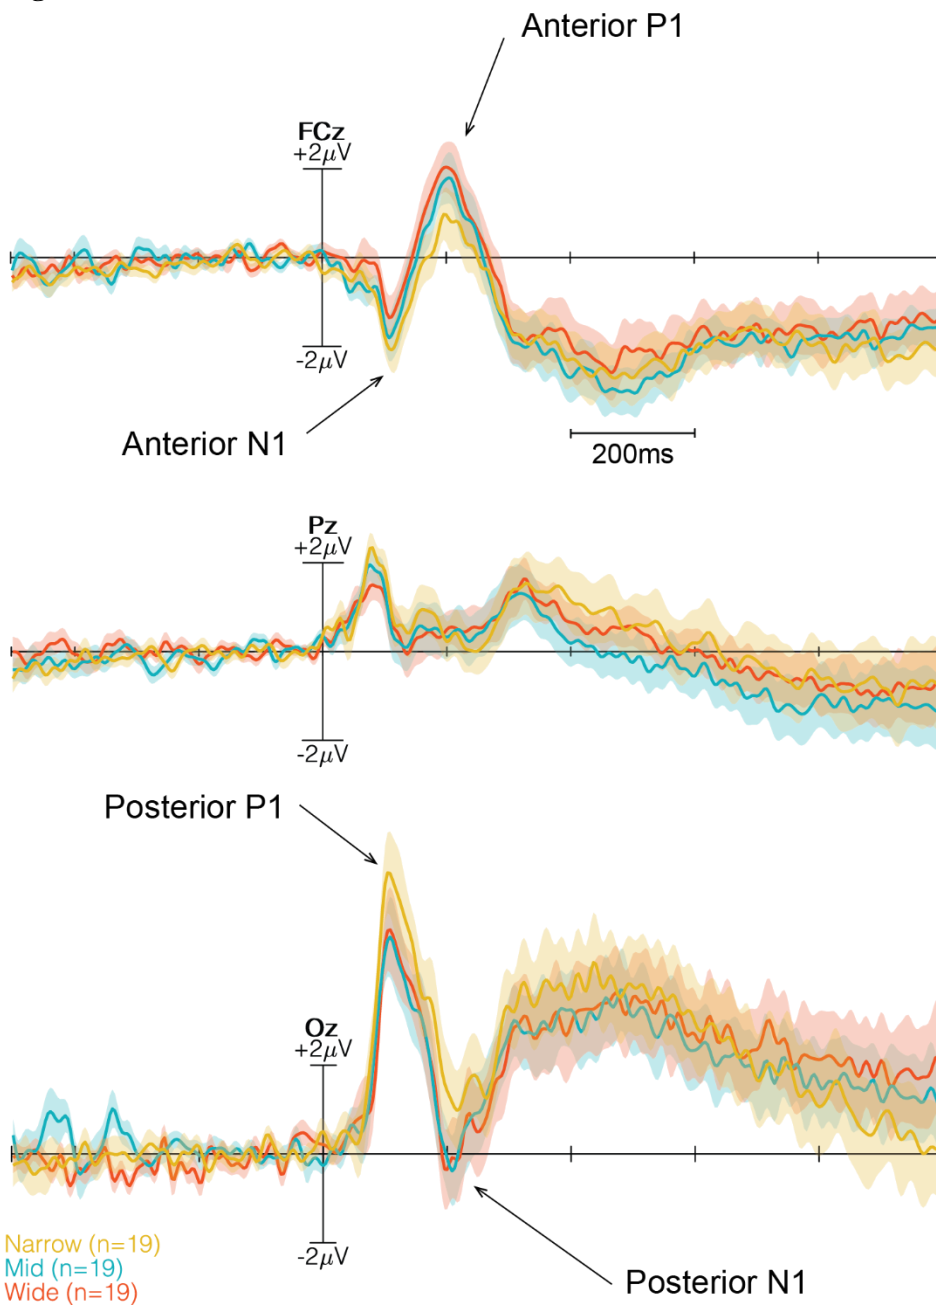

892  
893

894 **Figure 6:**

**Posterior P1**

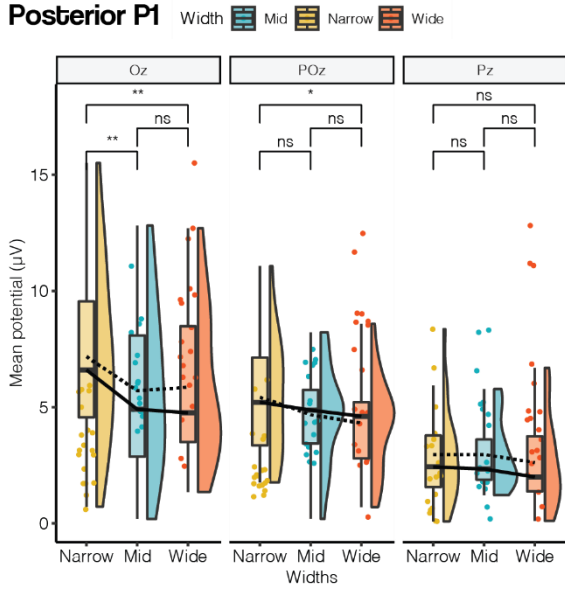

**Posterior N1**

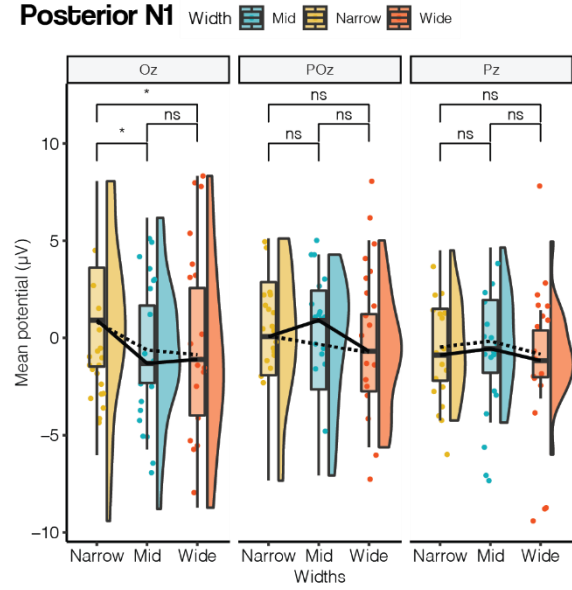

**Double plot**

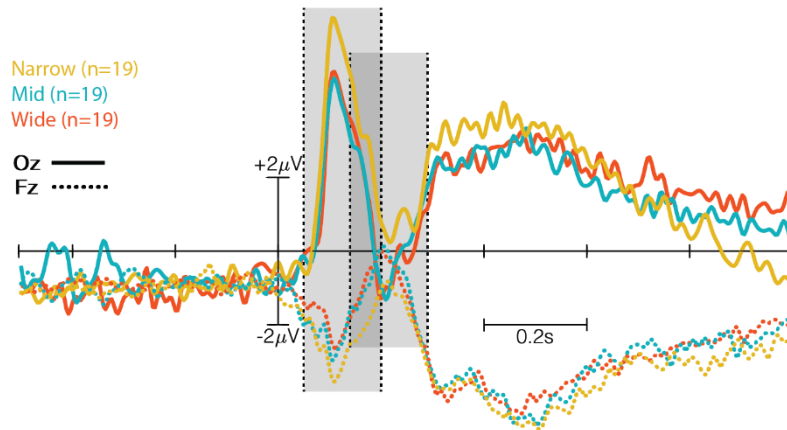

**Anterior N1**

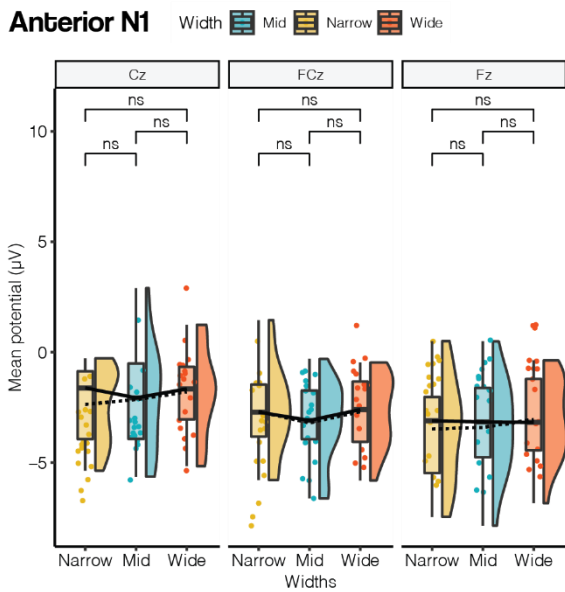

**Anterior P1**

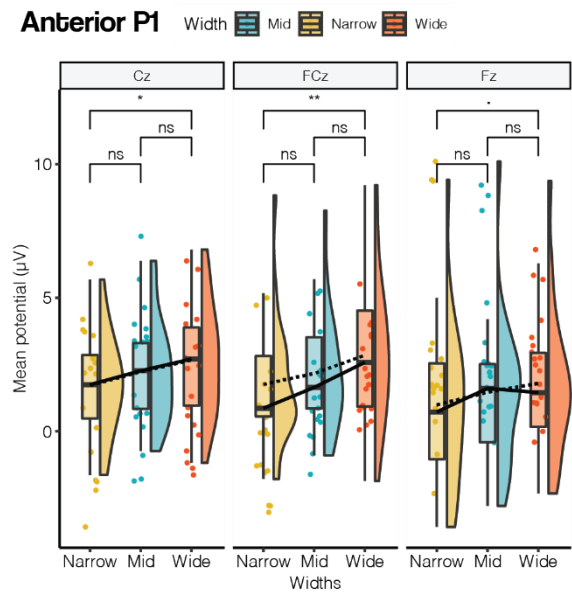

895

896

**Figure 7.1:**  
**Anterior EPIC**

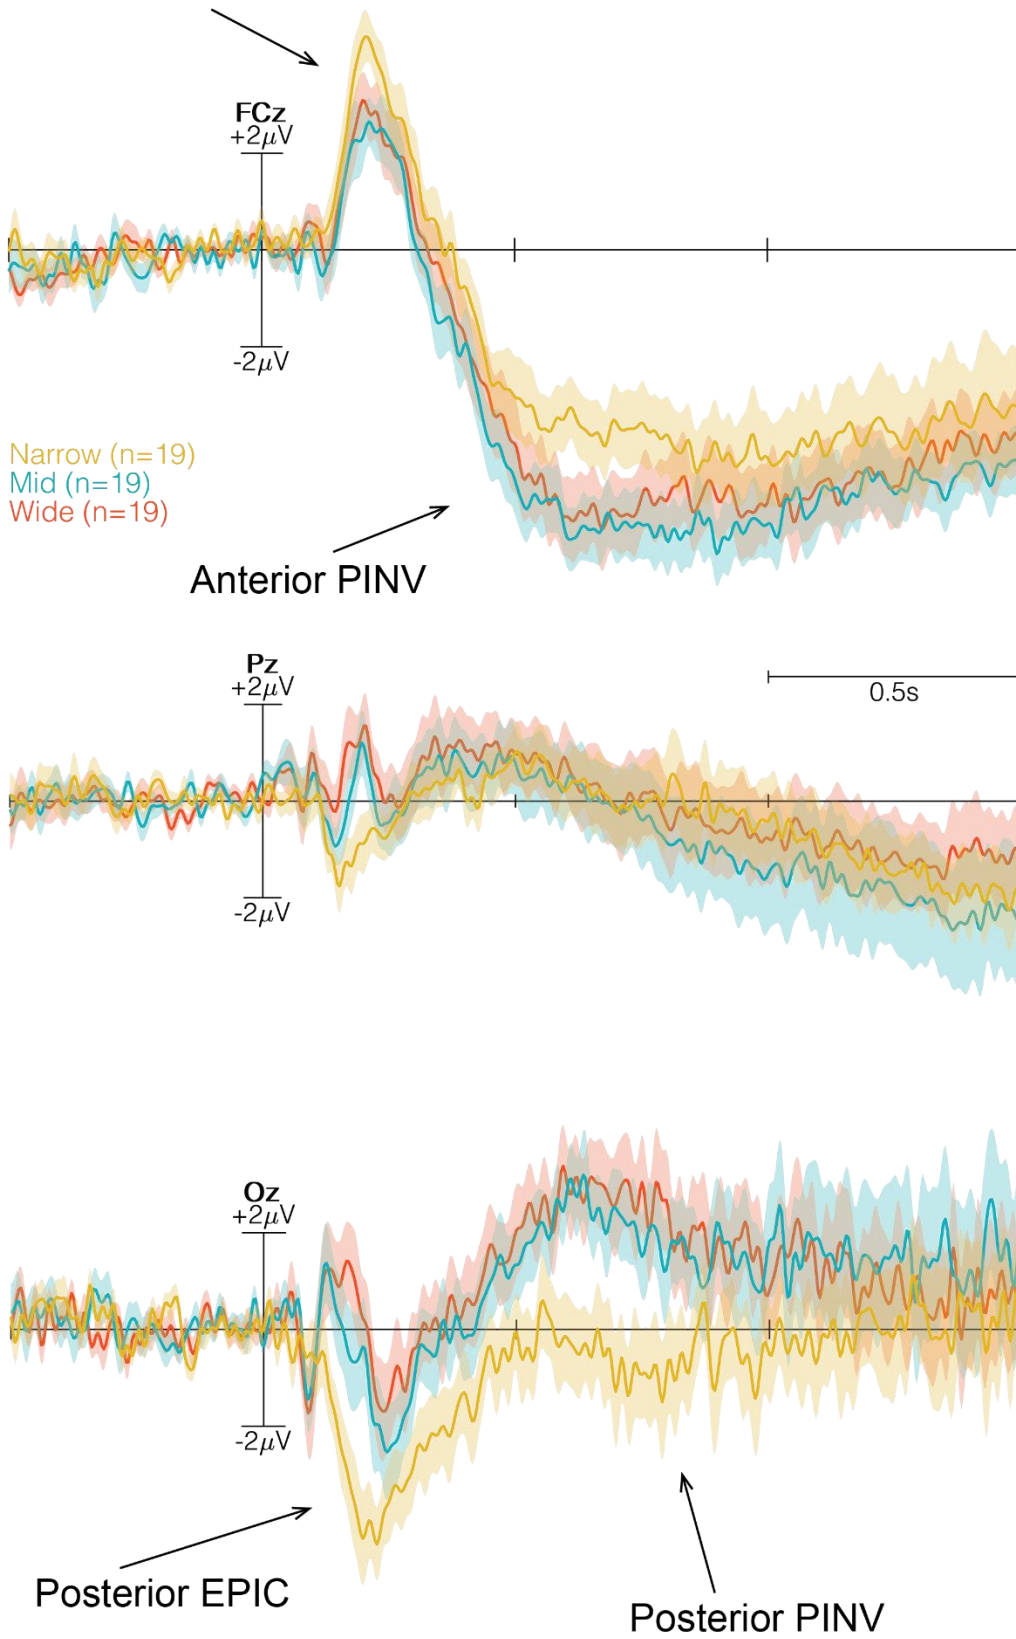

897

898

899 **Figure 8.1:**

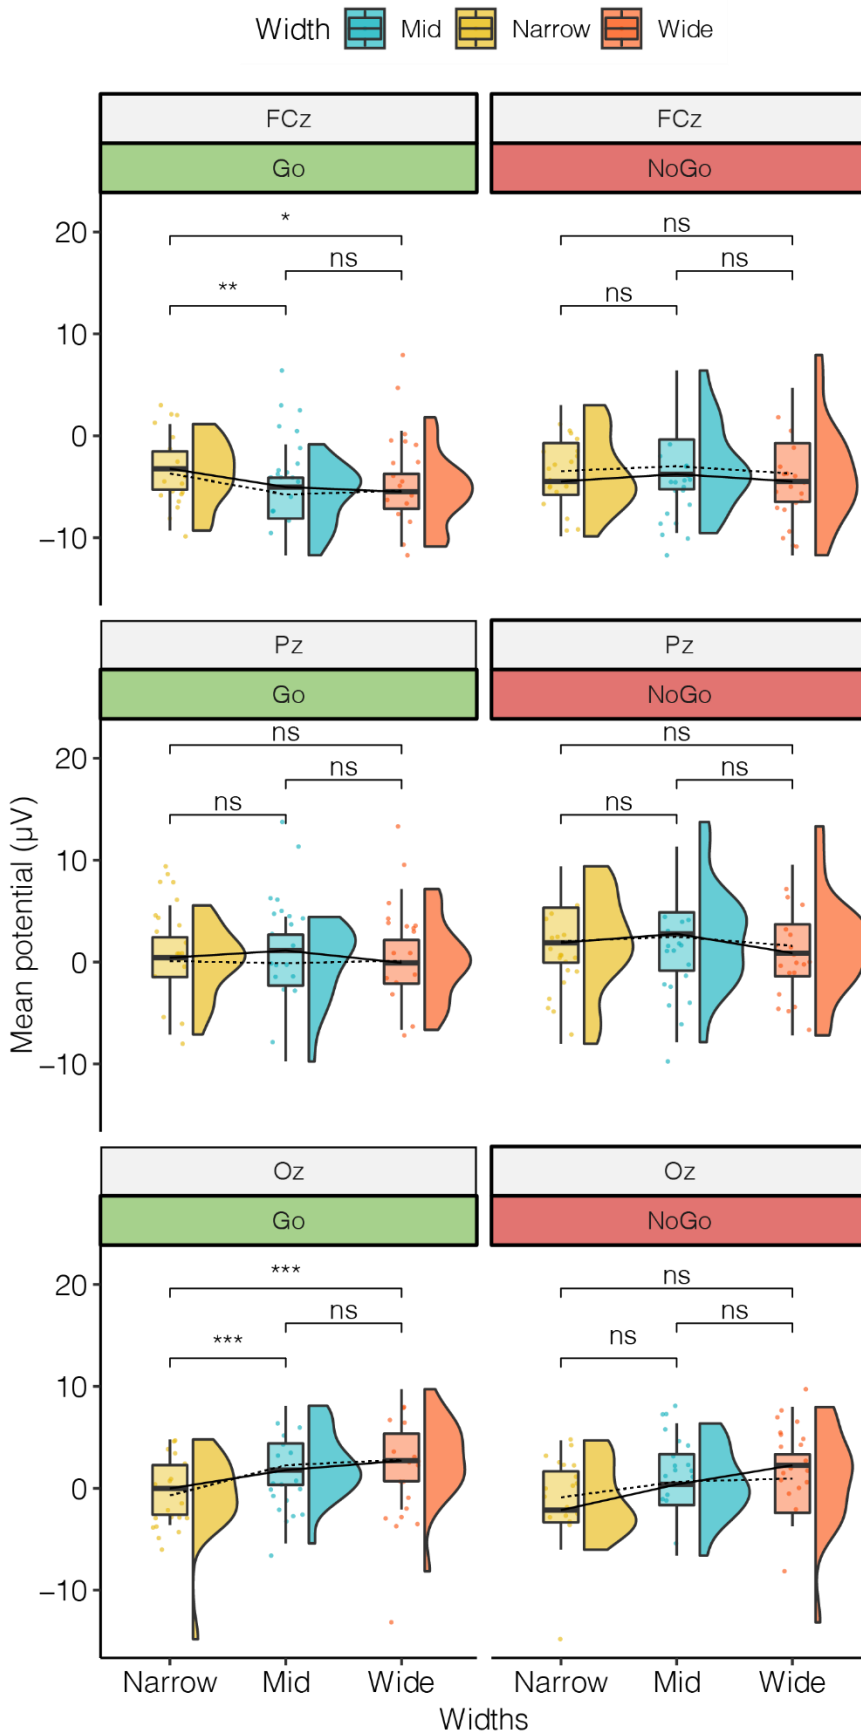

900

901 **Supplementary figures**

902

903 **Figure 5.2 – supplementary:**

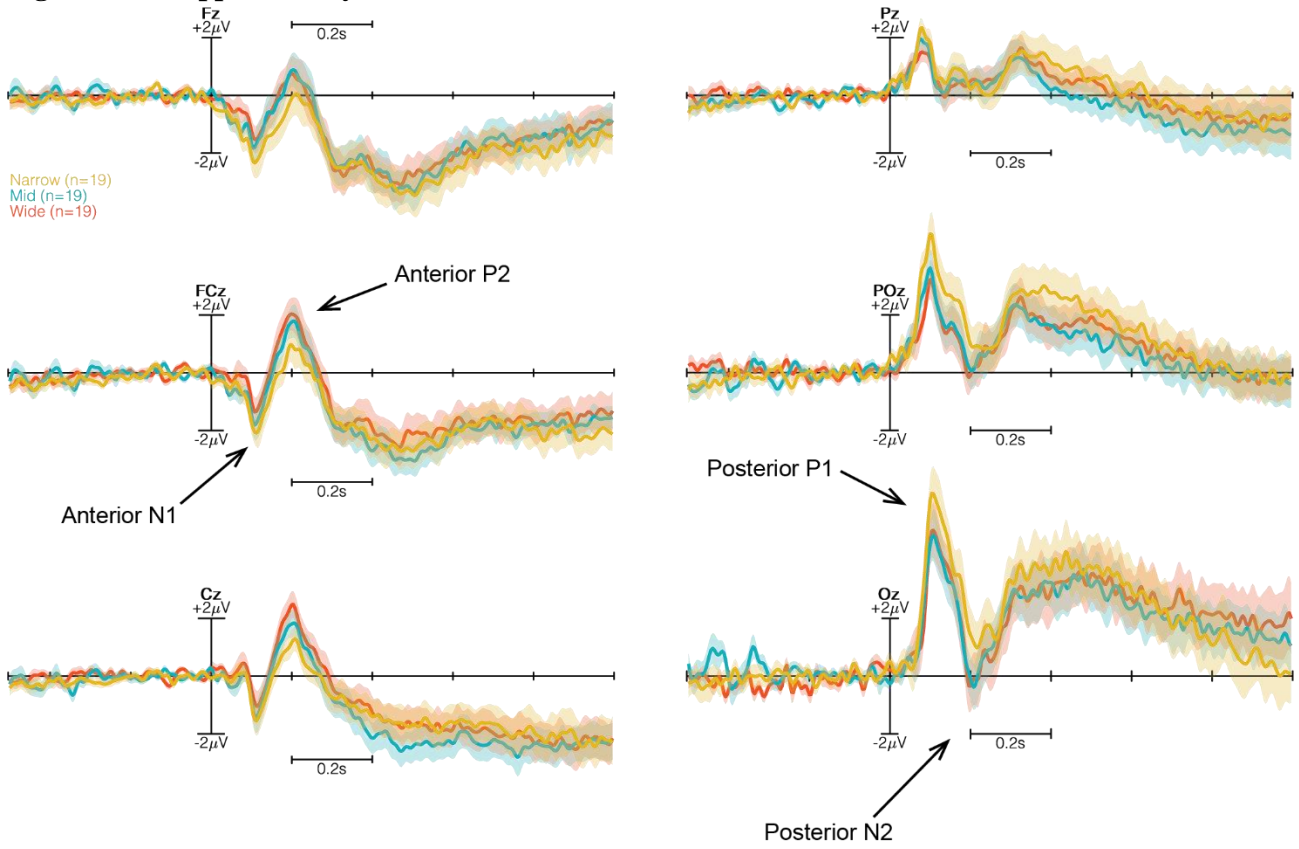

904

905

906 **Figure 7.2 – supplementary:**

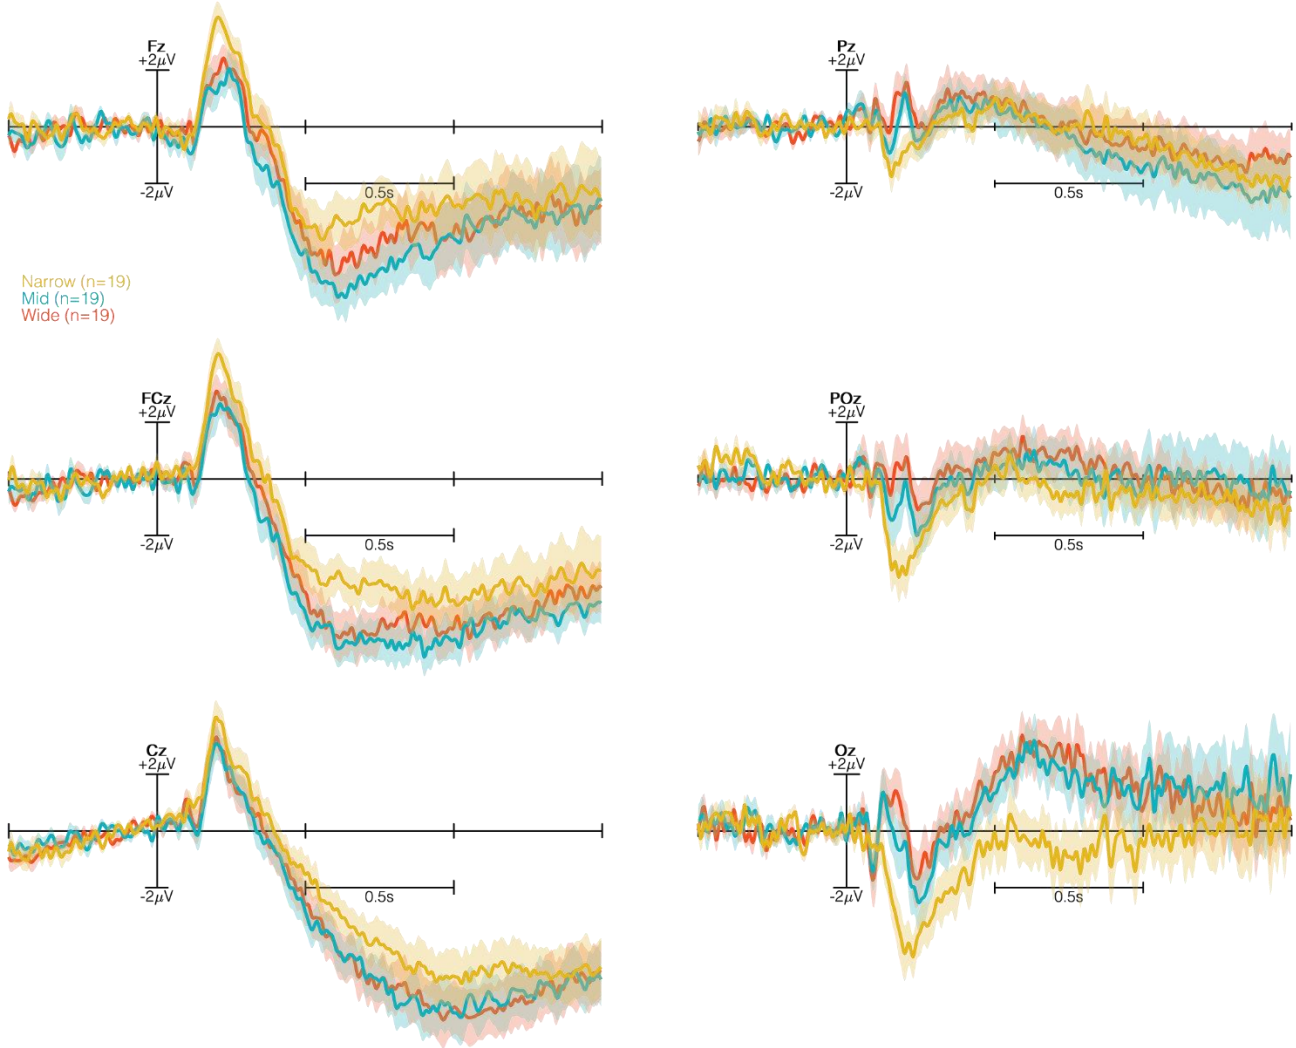

907  
908  
909

910 **Figure 8.2 - supplementary:**

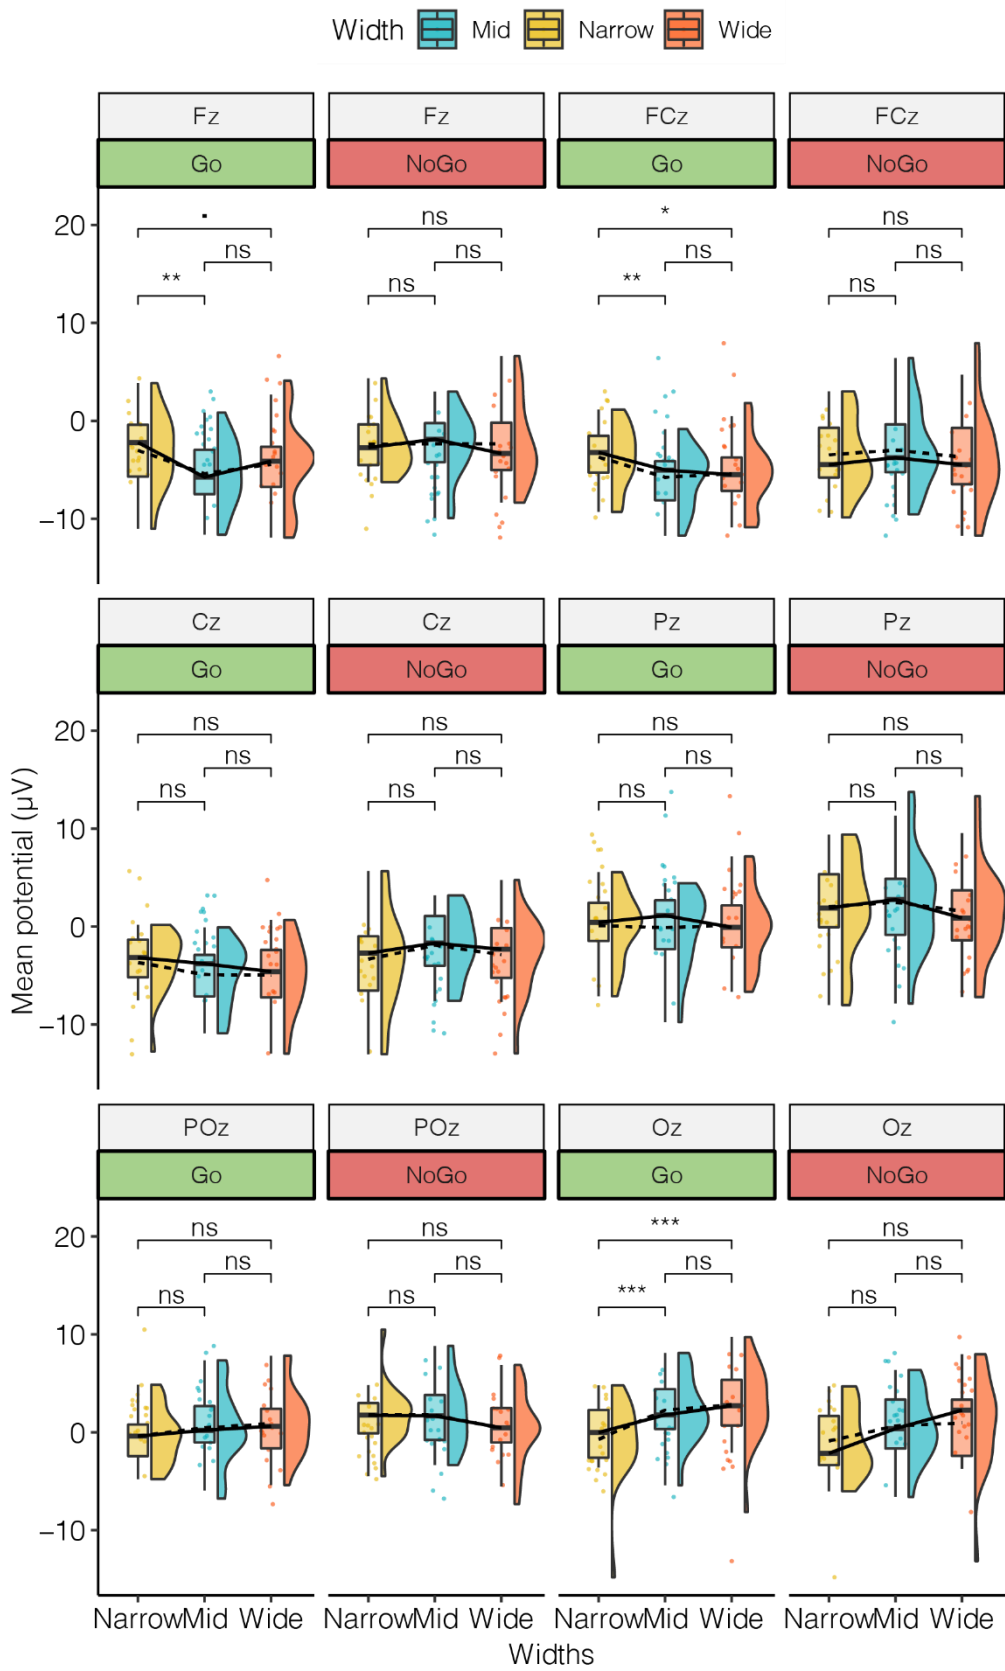

911  
912
